# Supplementary material
Source: MDPI journal article supplement (https://www.mdpi.com/2073-8994/14/9/1895)
Supplement: s1 [file s1]

## Supplementary Material for

# “Anti-symmetric medium chirality leading to symmetric field helicity in response to a pair of circularly polarized plane waves in counter-propagating configuration”

HYOUNG-IN LEE

Research Institute of Mathematics, Seoul National University, 599 Gwanak-Ro, Gwanak-Gu, Seoul, Republic of Korea  
08826  
[hileesam@naver.com](mailto:hileesam@naver.com)

### Section S1. Energy conservation laws for any pair of $\{\mathbf{D}, \mathbf{B}\}$

Recall that the set of generic formulas presented in the main text are all derived by processing the Faraday law  $\nabla \times \mathbf{E} = i\mathbf{B}$  and the Ampère's law  $\nabla \times \mathbf{H} = -i\mathbf{D}$  by forming the dot products  $\mathbf{H}^* \cdot (\nabla \times \mathbf{E}) = i\mathbf{H}^* \cdot \mathbf{B}$  and  $\mathbf{E}^* \cdot (\nabla \times \mathbf{H}) = -i\mathbf{E}^* \cdot \mathbf{D}$ .

In this section, we will try another approach of forming another pair of dot products  $\mathbf{B}^* \cdot (\nabla \times \mathbf{E}) = i\mathbf{B}^* \cdot \mathbf{B}$  and  $\mathbf{D}^* \cdot (\nabla \times \mathbf{H}) = -i\mathbf{D}^* \cdot \mathbf{D}$ . The ensuing set of all pertinent formulas are no less complicated than the ones presented in the main text. This distinction between the two approaches is again linked to the Abraham-Minkowski dilemma, which lies beyond the scope of this study.

Establishing a sum and a difference between the two relations,

$$\begin{aligned} \begin{cases} \nabla \times \mathbf{E} = i\mathbf{B} \\ \nabla \times \mathbf{H} = -i\mathbf{D} \end{cases} &\Rightarrow \begin{cases} \mathbf{B}^* \cdot (\nabla \times \mathbf{E}) = i\mathbf{B}^* \cdot \mathbf{B} \\ \mathbf{D}^* \cdot (\nabla \times \mathbf{H}) = -i\mathbf{D}^* \cdot \mathbf{D} \end{cases} \Rightarrow \begin{cases} \mathbf{H}^* \cdot (\mathbf{FL}) - \mathbf{E}^* \cdot (\mathbf{AL}): \\ \mathbf{H}^* \cdot (\mathbf{FL}) + \mathbf{E}^* \cdot (\mathbf{AL}): \end{cases} \\ \begin{cases} \mathbf{H}^* \cdot (\mathbf{FL}) - \mathbf{E}^* \cdot (\mathbf{AL}): \\ \mathbf{H}^* \cdot (\mathbf{FL}) + \mathbf{E}^* \cdot (\mathbf{AL}): \end{cases} &\begin{cases} \mathbf{B}^* \cdot (\nabla \times \mathbf{E}) - \mathbf{D}^* \cdot (\nabla \times \mathbf{H}) = i(\mathbf{B}^* \cdot \mathbf{B} + \mathbf{D}^* \cdot \mathbf{D}) = 2i\frac{1}{2}(|\mathbf{B}|^2 + |\mathbf{D}|^2) \\ \mathbf{B}^* \cdot (\nabla \times \mathbf{E}) + \mathbf{D}^* \cdot (\nabla \times \mathbf{H}) = i(\mathbf{B}^* \cdot \mathbf{B} - \mathbf{D}^* \cdot \mathbf{D}) = 2i\frac{1}{2}(|\mathbf{B}|^2 - |\mathbf{D}|^2) \end{cases} \Rightarrow \quad (S1.1) \\ \begin{cases} I_{\text{BD}} \equiv \frac{1}{2}(|\mathbf{D}|^2 + |\mathbf{B}|^2) \geq 0 \\ J_{\text{BD}} \equiv \frac{1}{2}(|\mathbf{D}|^2 - |\mathbf{B}|^2) \geq 0 \end{cases} &\Rightarrow \begin{cases} \mathbf{B}^* \cdot (\nabla \times \mathbf{E}) - \mathbf{D}^* \cdot (\nabla \times \mathbf{H}) = 2iI_{\text{BD}} \\ \mathbf{B}^* \cdot (\nabla \times \mathbf{E}) + \mathbf{D}^* \cdot (\nabla \times \mathbf{H}) = -2iJ_{\text{BD}} \end{cases} \end{aligned}$$

This pair of the EM and reactive energy densities are positive for any pair  $\{\mathbf{D}, \mathbf{B}\}$  for the electric displacement and the magnetic induction. Via vector identities,

$$\begin{aligned}
\nabla \times (\mathbf{A} \times \mathbf{B}) &= (\nabla \cdot \mathbf{B}) \mathbf{A} - (\nabla \cdot \mathbf{A}) \mathbf{B} - (\mathbf{A} \cdot \nabla) \mathbf{B} + (\mathbf{B} \cdot \nabla) \mathbf{A} \Rightarrow \\
\nabla \cdot (\mathbf{A} \times \mathbf{B}) &= (\nabla \times \mathbf{A}) \cdot \mathbf{B} - (\nabla \times \mathbf{B}) \cdot \mathbf{A} \Rightarrow \mathbf{B} \cdot (\nabla \times \mathbf{A}) = \nabla \cdot (\mathbf{A} \times \mathbf{B}) + (\nabla \times \mathbf{B}) \cdot \mathbf{A} \Rightarrow \\
\begin{cases} \mathbf{B}^* \cdot (\nabla \times \mathbf{E}) = \nabla \cdot (\mathbf{E} \times \mathbf{B}^*) + (\nabla \times \mathbf{B}^*) \cdot \mathbf{E} \\ \mathbf{D}^* \cdot (\nabla \times \mathbf{H}) = \nabla \cdot (\mathbf{H} \times \mathbf{D}^*) + (\nabla \times \mathbf{D}^*) \cdot \mathbf{H} \end{cases} &\Rightarrow \begin{cases} \mathbf{B}^* \cdot (\nabla \times \mathbf{E}) - \mathbf{D}^* \cdot (\nabla \times \mathbf{H}) = 2iI_{\text{BD}} \\ \mathbf{B}^* \cdot (\nabla \times \mathbf{E}) + \mathbf{D}^* \cdot (\nabla \times \mathbf{H}) = -2iJ_{\text{BD}} \end{cases} \Rightarrow \quad (S1.2) \\
\begin{cases} \nabla \cdot (\mathbf{E} \times \mathbf{B}^*) + (\nabla \times \mathbf{B}^*) \cdot \mathbf{E} - \nabla \cdot (\mathbf{H} \times \mathbf{D}^*) - (\nabla \times \mathbf{D}^*) \cdot \mathbf{H} = 2iI_{\text{BD}} \\ \nabla \cdot (\mathbf{E} \times \mathbf{B}^*) + (\nabla \times \mathbf{B}^*) \cdot \mathbf{E} + \nabla \cdot (\mathbf{H} \times \mathbf{D}^*) + (\nabla \times \mathbf{D}^*) \cdot \mathbf{H} = -2iJ_{\text{BD}} \end{cases}
\end{aligned}$$

Let us take the respective real and imaginary parts.

$$\begin{aligned}
&\begin{cases} \frac{1}{2} \text{Re} [\nabla \cdot (\mathbf{E} \times \mathbf{B}^*) - \nabla \cdot (\mathbf{H} \times \mathbf{D}^*)] + \frac{1}{2} \text{Re} [(\nabla \times \mathbf{B}^*) \cdot \mathbf{E} - (\nabla \times \mathbf{D}^*) \cdot \mathbf{H}] = 0 \\ \frac{1}{2} \text{Im} [\nabla \cdot (\mathbf{E} \times \mathbf{B}^*) - \nabla \cdot (\mathbf{H} \times \mathbf{D}^*)] + \frac{1}{2} \text{Im} [(\nabla \times \mathbf{B}^*) \cdot \mathbf{E} - (\nabla \times \mathbf{D}^*) \cdot \mathbf{H}] = I_{\text{BD}} \end{cases} \\
&\begin{cases} \frac{1}{2} \text{Re} [\nabla \cdot (\mathbf{E} \times \mathbf{B}^*) + \nabla \cdot (\mathbf{H} \times \mathbf{D}^*)] + \frac{1}{2} \text{Re} [(\nabla \times \mathbf{B}^*) \cdot \mathbf{E} + (\nabla \times \mathbf{D}^*) \cdot \mathbf{H}] = 0 \\ \frac{1}{2} \text{Im} [\nabla \cdot (\mathbf{E} \times \mathbf{B}^*) + \nabla \cdot (\mathbf{H} \times \mathbf{D}^*)] + \frac{1}{2} \text{Im} [(\nabla \times \mathbf{B}^*) \cdot \mathbf{E} + (\nabla \times \mathbf{D}^*) \cdot \mathbf{H}] = -J_{\text{BD}} \end{cases} \\
&\mathbf{H}^* \cdot (\mathbf{FL}) - \mathbf{E}^* \cdot (\mathbf{AL}) : \quad (S1.3) \\
&\begin{cases} \nabla \cdot [\frac{1}{2} \text{Re} (\mathbf{E} \times \mathbf{B}^* - \mathbf{H} \times \mathbf{D}^*)] + \frac{1}{2} \text{Re} [(\nabla \times \mathbf{B}^*) \cdot \mathbf{E} - (\nabla \times \mathbf{D}^*) \cdot \mathbf{H}] = 0 \\ \nabla \cdot [\frac{1}{2} \text{Im} (\mathbf{E} \times \mathbf{B}^* - \mathbf{H} \times \mathbf{D}^*)] + \frac{1}{2} \text{Im} [(\nabla \times \mathbf{B}^*) \cdot \mathbf{E} - (\nabla \times \mathbf{D}^*) \cdot \mathbf{H}] = I_{\text{BD}} \end{cases} \\
&\mathbf{H}^* \cdot (\mathbf{FL}) + \mathbf{E}^* \cdot (\mathbf{AL}) :
\end{aligned}$$

$$\begin{cases} \nabla \cdot [\frac{1}{2} \text{Re} (\mathbf{E} \times \mathbf{B}^* + \mathbf{H} \times \mathbf{D}^*)] + \frac{1}{2} \text{Re} [(\nabla \times \mathbf{B}^*) \cdot \mathbf{E} + (\nabla \times \mathbf{D}^*) \cdot \mathbf{H}] = 0 \\ \nabla \cdot [\frac{1}{2} \text{Im} (\mathbf{E} \times \mathbf{B}^* + \mathbf{H} \times \mathbf{D}^*)] + \frac{1}{2} \text{Im} [(\nabla \times \mathbf{B}^*) \cdot \mathbf{E} + (\nabla \times \mathbf{D}^*) \cdot \mathbf{H}] = -J_{\text{BD}} \end{cases}$$

Recall the two types of constitutive relations.

$$C_{\beta}^{\text{curl}} : \begin{cases} \mathbf{D} = \varepsilon (\mathbf{E} + \beta \nabla \times \mathbf{E}) \\ \mathbf{B} = \mu (\mathbf{H} + \beta \nabla \times \mathbf{H}) \end{cases}; \quad C_{\kappa}^{\text{field}} : \begin{cases} \mathbf{D} = \varepsilon \mathbf{E} + i \kappa \mathbf{H} \\ \mathbf{B} = \mu \mathbf{H} - i \kappa \mathbf{E} \end{cases} \Rightarrow \begin{cases} I_{\text{BD}} \equiv \frac{1}{2} (|\mathbf{D}|^2 + |\mathbf{B}|^2) \geq 0 \\ J_{\text{BD}} \equiv \frac{1}{2} (|\mathbf{D}|^2 - |\mathbf{B}|^2) \geq 0 \end{cases}. \quad (S1.4)$$

For the curl-based pair of constitutive relations,

$$\varepsilon, \mu \in \mathbb{R}$$

$$C_{\beta}^{curl} :$$

$$\begin{aligned}
2I_{\text{BD}} &= |\mathbf{D}|^2 - |\mathbf{B}|^2 = |\varepsilon \mathbf{E} + i\kappa \mathbf{H}|^2 + |\mu \mathbf{H} - i\kappa \mathbf{E}|^2 \\
&= (\varepsilon \mathbf{E} + i\kappa \mathbf{H})^* \cdot (\varepsilon \mathbf{E} + i\kappa \mathbf{H}) + (\mu \mathbf{H} - i\kappa \mathbf{E})^* \cdot (\mu \mathbf{H} - i\kappa \mathbf{E}) \\
&= \varepsilon^2 |\mathbf{E}|^2 + \kappa^2 |\mathbf{H}|^2 + \mu^2 |\mathbf{H}|^2 + \kappa^2 |\mathbf{E}|^2 + i\kappa \varepsilon \mathbf{E}^* \cdot \mathbf{H} - i\kappa \varepsilon \mathbf{E} \cdot \mathbf{H}^* + i\kappa \mu \mathbf{E}^* \cdot \mathbf{H} - i\kappa \mu \mathbf{E} \cdot \mathbf{H}^* \\
&= (\varepsilon^2 + \kappa^2) |\mathbf{E}|^2 + (\mu^2 + \kappa^2) |\mathbf{H}|^2 + \text{Re}[i\kappa(\varepsilon + \mu) \mathbf{E}^* \cdot \mathbf{H}] \\
&= (\varepsilon^2 + \kappa^2) |\mathbf{E}|^2 + (\mu^2 + \kappa^2) |\mathbf{H}|^2 - \text{Im}[\kappa(\varepsilon + \mu) \mathbf{E}^* \cdot \mathbf{H}] \\
&= (\varepsilon^2 + \kappa^2) |\mathbf{E}|^2 + (\mu^2 + \kappa^2) |\mathbf{H}|^2 + \kappa(\varepsilon + \mu) \text{Im}(\mathbf{E} \cdot \mathbf{H}^*) \\
2J_{\text{BD}} &= |\mathbf{D}|^2 - |\mathbf{B}|^2 = |\varepsilon \mathbf{E} + i\kappa \mathbf{H}|^2 - |\mu \mathbf{H} - i\kappa \mathbf{E}|^2 \\
&= (\varepsilon \mathbf{E} + i\kappa \mathbf{H})^* \cdot (\varepsilon \mathbf{E} + i\kappa \mathbf{H}) - (\mu \mathbf{H} - i\kappa \mathbf{E})^* \cdot (\mu \mathbf{H} - i\kappa \mathbf{E}) \\
&= \varepsilon^2 |\mathbf{E}|^2 + \kappa^2 |\mathbf{H}|^2 - \mu^2 |\mathbf{H}|^2 - \kappa^2 |\mathbf{E}|^2 + i\kappa \varepsilon \mathbf{E}^* \cdot \mathbf{H} - i\kappa \varepsilon \mathbf{E} \cdot \mathbf{H}^* - i\kappa \mu \mathbf{E}^* \cdot \mathbf{H} + i\kappa \mu \mathbf{E} \cdot \mathbf{H}^* \\
&= (\varepsilon^2 - \kappa^2) |\mathbf{E}|^2 - (\mu^2 - \kappa^2) |\mathbf{H}|^2 + \text{Re}[i\kappa(\varepsilon - \mu) \mathbf{E}^* \cdot \mathbf{H}] \\
&= (\varepsilon^2 - \kappa^2) |\mathbf{E}|^2 - (\mu^2 - \kappa^2) |\mathbf{H}|^2 - \text{Im}[\kappa(\varepsilon - \mu) \mathbf{E}^* \cdot \mathbf{H}] \\
&= (\varepsilon^2 - \kappa^2) |\mathbf{E}|^2 - (\mu^2 - \kappa^2) |\mathbf{H}|^2 + \kappa(\varepsilon - \mu) \text{Im}(\mathbf{E} \cdot \mathbf{H}^*)
\end{aligned} \tag{S1.5}$$

For the field-based constitutive relations,

$$\varepsilon, \mu \in \mathbb{R}$$

$$C_{\beta}^{curl} :$$

$$\begin{aligned}
2I_{\text{BD}} &= |\mathbf{D}|^2 - |\mathbf{B}|^2 = |\varepsilon(\mathbf{E} + \beta \nabla \times \mathbf{E})|^2 + |\mu(\mathbf{H} + \beta \nabla \times \mathbf{H})|^2 \\
&= \varepsilon^2 (\mathbf{E}^* + \beta \nabla \times \mathbf{E}^*) \cdot (\mathbf{E} + \beta \nabla \times \mathbf{E}) + \mu^2 (\mathbf{H}^* + \beta \nabla \times \mathbf{H}^*) \cdot (\mathbf{H} + \beta \nabla \times \mathbf{H}) \\
&= \varepsilon^2 |\mathbf{E}|^2 + \varepsilon^2 \beta^2 |\nabla \times \mathbf{E}|^2 + \mu^2 |\mathbf{H}|^2 + \mu^2 \beta^2 |\nabla \times \mathbf{H}|^2 \\
&\quad + 2\varepsilon^2 \beta \text{Re}[\mathbf{E}^* \cdot (\nabla \times \mathbf{E})] + 2\mu^2 \beta \text{Re}[\mathbf{H}^* \cdot (\nabla \times \mathbf{H})] \\
2J_{\text{BD}} &= |\mathbf{D}|^2 - |\mathbf{B}|^2 = |\varepsilon(\mathbf{E} + \beta \nabla \times \mathbf{E})|^2 - |\mu(\mathbf{H} + \beta \nabla \times \mathbf{H})|^2 \\
&= \varepsilon^2 (\mathbf{E}^* + \beta \nabla \times \mathbf{E}^*) \cdot (\mathbf{E} + \beta \nabla \times \mathbf{E}) - \mu^2 (\mathbf{H}^* + \beta \nabla \times \mathbf{H}^*) \cdot (\mathbf{H} + \beta \nabla \times \mathbf{H}) \\
&= \varepsilon^2 |\mathbf{E}|^2 + \varepsilon^2 \beta^2 |\nabla \times \mathbf{E}|^2 - \mu^2 |\mathbf{H}|^2 - \mu^2 \beta^2 |\nabla \times \mathbf{H}|^2 \\
&\quad + 2\varepsilon^2 \beta \text{Re}[\mathbf{E}^* \cdot (\nabla \times \mathbf{E})] - 2\mu^2 \beta \text{Re}[\mathbf{H}^* \cdot (\nabla \times \mathbf{H})]
\end{aligned} \tag{S1.6}$$

In addition to the divergence (potential-like) terms, we still obtain non-divergent terms. Consequently, the approach to obtaining the energy conservations laws based on the pair  $\{\mathbf{D}, \mathbf{B}\}$  does not pay off.

Meanwhile, we have the following set of dot products and cross products that use quite useful in the following two sections.

$$\begin{aligned}
\nabla \cdot (\mathbf{A} \times \mathbf{B}) &= (\nabla \times \mathbf{A}) \cdot \mathbf{B} - (\nabla \times \mathbf{B}) \cdot \mathbf{A} \Rightarrow (\nabla \times \mathbf{A}) \cdot \mathbf{B} = \nabla \cdot (\mathbf{A} \times \mathbf{B}) + (\nabla \times \mathbf{B}) \cdot \mathbf{A} \\
\begin{cases} \mathbf{H}^* \cdot (\nabla \times \mathbf{E}) = (\nabla \times \mathbf{E}) \cdot \mathbf{H}^* = \nabla \cdot (\mathbf{E} \times \mathbf{H}^*) + (\nabla \times \mathbf{H}^*) \cdot \mathbf{E} \\ \mathbf{E}^* \cdot (\nabla \times \mathbf{H}) = (\nabla \times \mathbf{H}) \cdot \mathbf{E}^* = \nabla \cdot (\mathbf{H} \times \mathbf{E}^*) + (\nabla \times \mathbf{E}^*) \cdot \mathbf{H} \end{cases} \\
\begin{cases} \mathbf{E}^* \cdot (\nabla \times \mathbf{E}) = (\nabla \times \mathbf{E}) \cdot \mathbf{E}^* = \nabla \cdot (\mathbf{E} \times \mathbf{E}^*) + (\nabla \times \mathbf{E}^*) \cdot \mathbf{E} \\ \mathbf{H}^* \cdot (\nabla \times \mathbf{H}) = (\nabla \times \mathbf{H}) \cdot \mathbf{H}^* = \nabla \cdot (\mathbf{H} \times \mathbf{H}^*) + (\nabla \times \mathbf{H}^*) \cdot \mathbf{H} \end{cases}
\end{aligned} \tag{S1.7}$$

Based on the preceding set, we make a difference and a sum of the above pair.

$$\begin{aligned}
dif: \quad & \mathbf{H}^* \cdot (\nabla \times \mathbf{E}) + \mathbf{E}^* \cdot (\nabla \times \mathbf{H}) = \nabla \cdot (\mathbf{E} \times \mathbf{H}^*) + (\nabla \times \mathbf{H}^*) \cdot \mathbf{E} + \nabla \cdot (\mathbf{H} \times \mathbf{E}^*) + (\nabla \times \mathbf{E}^*) \cdot \mathbf{H} \\
& = \nabla \cdot (\mathbf{E} \times \mathbf{H}^*) + \nabla \cdot (\mathbf{H} \times \mathbf{E}^*) + (\nabla \times \mathbf{H}^*) \cdot \mathbf{E} + (\nabla \times \mathbf{E}^*) \cdot \mathbf{H} \\
& = \nabla \cdot (\mathbf{E} \times \mathbf{H}^*) - \nabla \cdot (\mathbf{E}^* \times \mathbf{H}) + (\nabla \times \mathbf{H}^*) \cdot \mathbf{E} + (\nabla \times \mathbf{E}^*) \cdot \mathbf{H} \\
sum: \quad & \mathbf{H}^* \cdot (\nabla \times \mathbf{E}) - \mathbf{E}^* \cdot (\nabla \times \mathbf{H}) = \nabla \cdot (\mathbf{E} \times \mathbf{H}^*) + (\nabla \times \mathbf{H}^*) \cdot \mathbf{E} - \nabla \cdot (\mathbf{H} \times \mathbf{E}^*) - (\nabla \times \mathbf{E}^*) \cdot \mathbf{H} \\
& = \nabla \cdot (\mathbf{E} \times \mathbf{H}^*) - \nabla \cdot (\mathbf{H} \times \mathbf{E}^*) + (\nabla \times \mathbf{H}^*) \cdot \mathbf{E} - (\nabla \times \mathbf{E}^*) \cdot \mathbf{H} \\
& = \nabla \cdot (\mathbf{E} \times \mathbf{H}^*) + \nabla \cdot (\mathbf{E}^* \times \mathbf{H}) + (\nabla \times \mathbf{H}^*) \cdot \mathbf{E} - (\nabla \times \mathbf{E}^*) \cdot \mathbf{H}
\end{aligned} \tag{S1.8}$$

It is useful to introduce the following pairs of auxiliary vectors.

$$\begin{cases} \mathbf{A}_\pm \equiv [\mathbf{E}^* \cdot (\nabla \times \mathbf{H}) \mp \mathbf{H}^* \cdot (\nabla \times \mathbf{E})]^* \\ \mathbf{B}_\pm \equiv \mu \mathbf{H}^* \cdot (\nabla \times \mathbf{H}) \mp \varepsilon \mathbf{E}^* \cdot (\nabla \times \mathbf{E}) \end{cases} \tag{S1.9}$$

## Section S2. Energy conservation laws for curl-based constitutive relations

For a chiral media with the curl-  $\beta$  -based constitutive relations, let us examine the Maxwell equations.

$$\begin{aligned}
& \begin{cases} \nabla \times \mathbf{E} = i\mu(\mathbf{H} + \beta \nabla \times \mathbf{H}) \\ \nabla \times \mathbf{H} = -i\varepsilon(\mathbf{E} + \beta \nabla \times \mathbf{E}) \end{cases}, \quad \begin{cases} \nabla \cdot \mathbf{E} = 0 \\ \nabla \cdot \mathbf{H} = 0 \end{cases} \Rightarrow \\
& K \equiv \frac{i}{1 - \varepsilon\mu\beta^2} \begin{pmatrix} -i\varepsilon\mu\beta & \mu \\ -\varepsilon & -i\mu\varepsilon\beta \end{pmatrix}, \quad K^{-1} = \begin{pmatrix} -\beta & i\frac{1}{\varepsilon} \\ -i\frac{1}{\mu} & -\beta \end{pmatrix} \\
& \nabla \times \begin{Bmatrix} \mathbf{E} \\ \mathbf{H} \end{Bmatrix} = K \begin{Bmatrix} \mathbf{E} \\ \mathbf{H} \end{Bmatrix} \Rightarrow \begin{cases} \nabla \times \mathbf{E} = \frac{1}{1 - \varepsilon\mu\beta^2} (\varepsilon\mu\beta \mathbf{E} + i\mu \mathbf{H}) \\ \nabla \times \mathbf{H} = \frac{1}{1 - \varepsilon\mu\beta^2} (-i\varepsilon \mathbf{E} + \varepsilon\mu\beta \mathbf{H}) \end{cases} \tag{S2.1} \\
& \begin{Bmatrix} \mathbf{E} \\ \mathbf{H} \end{Bmatrix} = \begin{pmatrix} -\beta & i\frac{1}{\varepsilon} \\ -i\frac{1}{\mu} & -\beta \end{pmatrix} \begin{Bmatrix} \nabla \times \mathbf{E} \\ \nabla \times \mathbf{H} \end{Bmatrix} = \begin{Bmatrix} -\beta(\nabla \times \mathbf{E}) + i\frac{1}{\varepsilon}(\nabla \times \mathbf{H}) \\ -i\frac{1}{\mu}(\nabla \times \mathbf{E}) - \beta(\nabla \times \mathbf{H}) \end{Bmatrix}
\end{aligned}$$

Let the Faraday law  $\nabla \times \mathbf{E} = i\mu(\mathbf{H} + \beta \nabla \times \mathbf{H})$  and the Ampère's law  $\nabla \times \mathbf{H} = -i\varepsilon(\mathbf{E} + \beta \nabla \times \mathbf{E})$  be denoted respectively by **(FL)** and **(AL)**. We then take the difference  $\mathbf{H}^* \cdot (\mathbf{FL}) - \mathbf{E}^* \cdot (\mathbf{AL})$  and the sum  $\mathbf{H}^* \cdot (\mathbf{FL}) + \mathbf{E}^* \cdot (\mathbf{AL})$  so that the following two pairs are obtained when taking the respective real and imaginary parts.

$$\begin{cases} (\mathbf{FL}): \nabla \times \mathbf{E} = i\mu(\mathbf{H} + \beta \nabla \times \mathbf{H}) \\ (\mathbf{AL}): \nabla \times \mathbf{H} = -i\varepsilon(\mathbf{E} + \beta \nabla \times \mathbf{E}) \end{cases} \Rightarrow \begin{cases} \mathbf{H}^* \cdot (\nabla \times \mathbf{E}) = i\mu \mathbf{H}^* \cdot \mathbf{H} + i\mu\beta \mathbf{H}^* \cdot (\nabla \times \mathbf{H}) \\ \mathbf{E}^* \cdot (\nabla \times \mathbf{H}) = -i\varepsilon \mathbf{E}^* \cdot \mathbf{E} - i\varepsilon\beta \mathbf{E}^* \cdot (\nabla \times \mathbf{E}) \end{cases}$$

$$\begin{cases} \mathbf{H}^* \cdot (\mathbf{FL}) - \mathbf{E}^* \cdot (\mathbf{AL}): \mathbf{H}^* \cdot (\nabla \times \mathbf{E}) - \mathbf{E}^* \cdot (\nabla \times \mathbf{H}) \\ = i\varepsilon \mathbf{E}^* \cdot \mathbf{E} + i\mu \mathbf{H}^* \cdot \mathbf{H} + i\mu\beta \mathbf{H}^* \cdot (\nabla \times \mathbf{H}) + i\varepsilon\beta \mathbf{E}^* \cdot (\nabla \times \mathbf{E}) \\ \mathbf{H}^* \cdot (\mathbf{FL}) + \mathbf{E}^* \cdot (\mathbf{AL}): \mathbf{H}^* \cdot (\nabla \times \mathbf{E}) + \mathbf{E}^* \cdot (\nabla \times \mathbf{H}) \\ = -i\varepsilon \mathbf{E}^* \cdot \mathbf{E} + i\mu \mathbf{H}^* \cdot \mathbf{H} + i\mu\beta \mathbf{H}^* \cdot (\nabla \times \mathbf{H}) - i\varepsilon\beta \mathbf{E}^* \cdot (\nabla \times \mathbf{E}) \end{cases} \quad (S2.2)$$

Introduce average sum and average difference.

$$\begin{cases} I \equiv \frac{1}{2}(\varepsilon \mathbf{E}^* \cdot \mathbf{E} + \mu \mathbf{H}^* \cdot \mathbf{H}) \\ J \equiv \frac{1}{2}(\varepsilon \mathbf{E}^* \cdot \mathbf{E} - \mu \mathbf{H}^* \cdot \mathbf{H}) \end{cases} \Rightarrow \begin{cases} \mathbf{H}^* \cdot (\mathbf{FL}) - \mathbf{E}^* \cdot (\mathbf{AL}) \\ \mathbf{H}^* \cdot (\mathbf{FL}) + \mathbf{E}^* \cdot (\mathbf{AL}) \end{cases}$$

$$\begin{cases} \mathbf{H}^* \cdot (\mathbf{FL}) - \mathbf{E}^* \cdot (\mathbf{AL}): \frac{1}{2}[\mathbf{H}^* \cdot (\nabla \times \mathbf{E}) - \mathbf{E}^* \cdot (\nabla \times \mathbf{H})] = iI + \frac{1}{2}i\mu\beta \mathbf{H}^* \cdot (\nabla \times \mathbf{H}) + i\varepsilon\beta \mathbf{E}^* \cdot (\nabla \times \mathbf{E}) \\ \mathbf{H}^* \cdot (\mathbf{FL}) + \mathbf{E}^* \cdot (\mathbf{AL}): \frac{1}{2}[\mathbf{H}^* \cdot (\nabla \times \mathbf{E}) + \mathbf{E}^* \cdot (\nabla \times \mathbf{H})] = -iJ + \frac{1}{2}i\mu\beta \mathbf{H}^* \cdot (\nabla \times \mathbf{H}) - i\varepsilon\beta \mathbf{E}^* \cdot (\nabla \times \mathbf{E}) \\ \mathbf{H}^* \cdot (\mathbf{FL}) - \mathbf{E}^* \cdot (\mathbf{AL}): -iI + \frac{1}{2}[\mathbf{H}^* \cdot (\nabla \times \mathbf{E}) - \mathbf{E}^* \cdot (\nabla \times \mathbf{H})] = \frac{1}{2}i\mu\beta \mathbf{H}^* \cdot (\nabla \times \mathbf{H}) + i\varepsilon\beta \mathbf{E}^* \cdot (\nabla \times \mathbf{E}) \\ \mathbf{H}^* \cdot (\mathbf{FL}) + \mathbf{E}^* \cdot (\mathbf{AL}): iJ + \frac{1}{2}[\mathbf{H}^* \cdot (\nabla \times \mathbf{E}) + \mathbf{E}^* \cdot (\nabla \times \mathbf{H})] = \frac{1}{2}i\mu\beta \mathbf{H}^* \cdot (\nabla \times \mathbf{H}) - i\varepsilon\beta \mathbf{E}^* \cdot (\nabla \times \mathbf{E}) \\ \mathbf{H}^* \cdot (\mathbf{FL}) - \mathbf{E}^* \cdot (\mathbf{AL}): I + i\frac{1}{2}[\mathbf{H}^* \cdot (\nabla \times \mathbf{E}) - \mathbf{E}^* \cdot (\nabla \times \mathbf{H})] = -\frac{1}{2}\beta[\mu \mathbf{H}^* \cdot (\nabla \times \mathbf{H}) + \varepsilon \mathbf{E}^* \cdot (\nabla \times \mathbf{E})] \\ \mathbf{H}^* \cdot (\mathbf{FL}) + \mathbf{E}^* \cdot (\mathbf{AL}): J - i\frac{1}{2}[\mathbf{H}^* \cdot (\nabla \times \mathbf{E}) + \mathbf{E}^* \cdot (\nabla \times \mathbf{H})] = \frac{1}{2}\beta[\mu \mathbf{H}^* \cdot (\nabla \times \mathbf{H}) - \varepsilon \mathbf{E}^* \cdot (\nabla \times \mathbf{E})] \end{cases} \quad (S2.3)$$

Meanwhile, we make use of the set of dot and cross products. Taking difference and sum, we can prepare for the Poynting vectors.

$$\begin{cases} \mathbf{H}^* \cdot (\mathbf{FL}) - \mathbf{E}^* \cdot (\mathbf{AL}): I + i\frac{1}{2} \left[ \nabla \cdot (\mathbf{E} \times \mathbf{H}^*) + \nabla \cdot (\mathbf{E}^* \times \mathbf{H}) \right. \\ \left. + (\nabla \times \mathbf{H}^*) \cdot \mathbf{E} - (\nabla \times \mathbf{E}^*) \cdot \mathbf{H} \right] = -\frac{1}{2}\beta \left[ \mu \mathbf{H}^* \cdot (\nabla \times \mathbf{H}) \right. \\ \left. + \varepsilon \mathbf{E}^* \cdot (\nabla \times \mathbf{E}) \right] \\ \mathbf{H}^* \cdot (\mathbf{FL}) + \mathbf{E}^* \cdot (\mathbf{AL}): J - i\frac{1}{2} \left[ \nabla \cdot (\mathbf{E} \times \mathbf{H}^*) - \nabla \cdot (\mathbf{E}^* \times \mathbf{H}) \right. \\ \left. + (\nabla \times \mathbf{H}^*) \cdot \mathbf{E} + (\nabla \times \mathbf{E}^*) \cdot \mathbf{H} \right] = \frac{1}{2}\beta \left[ \mu \mathbf{H}^* \cdot (\nabla \times \mathbf{H}) \right. \\ \left. - \varepsilon \mathbf{E}^* \cdot (\nabla \times \mathbf{E}) \right] \\ \mathbf{H}^* \cdot (\mathbf{FL}) - \mathbf{E}^* \cdot (\mathbf{AL}): I + i\frac{1}{2} \left[ \nabla \cdot (\mathbf{E} \times \mathbf{H}^*) + \nabla \cdot (\mathbf{E}^* \times \mathbf{H}) \right. \\ \left. + i\frac{1}{2} \left[ (\nabla \times \mathbf{H}^*) \cdot \mathbf{E} - (\nabla \times \mathbf{E}^*) \cdot \mathbf{H} \right] \right] = -\frac{1}{2}\beta \left[ \mu \mathbf{H}^* \cdot (\nabla \times \mathbf{H}) + \varepsilon \mathbf{E}^* \cdot (\nabla \times \mathbf{E}) \right] \\ \mathbf{H}^* \cdot (\mathbf{FL}) + \mathbf{E}^* \cdot (\mathbf{AL}): J - i\frac{1}{2} \left[ \nabla \cdot (\mathbf{E} \times \mathbf{H}^*) - \nabla \cdot (\mathbf{E}^* \times \mathbf{H}) \right. \\ \left. - i\frac{1}{2} \left[ (\nabla \times \mathbf{H}^*) \cdot \mathbf{E} + (\nabla \times \mathbf{E}^*) \cdot \mathbf{H} \right] \right] = \frac{1}{2}\beta \left[ \mu \mathbf{H}^* \cdot (\nabla \times \mathbf{H}) - \varepsilon \mathbf{E}^* \cdot (\nabla \times \mathbf{E}) \right] \end{cases} \quad (S2.4)$$

Consider the following real and imaginary parts.

$$\begin{cases} \frac{1}{2} \left[ \nabla \cdot (\mathbf{E} \times \mathbf{H}^*) + \nabla \cdot (\mathbf{E}^* \times \mathbf{H}) \right] = \text{Re} \left[ \nabla \cdot (\mathbf{E} \times \mathbf{H}^*) \right] \\ -i\frac{1}{2} \left[ \nabla \cdot (\mathbf{E} \times \mathbf{H}^*) - \nabla \cdot (\mathbf{E}^* \times \mathbf{H}) \right] = \text{Im} \left[ \nabla \cdot (\mathbf{E} \times \mathbf{H}^*) \right] \end{cases} \quad (S2.5)$$

Therefore, the difference and sum become the following.

$$\left\{ \begin{array}{l} \mathbf{H}^* \cdot (\mathbf{FL}) - \mathbf{E}^* \cdot (\mathbf{AL}) : I + i \operatorname{Re} [\nabla \cdot (\mathbf{E} \times \mathbf{H}^*)] \\ + i \frac{1}{2} [(\nabla \times \mathbf{H}^*) \cdot \mathbf{E} - (\nabla \times \mathbf{E}^*) \cdot \mathbf{H}] = -\frac{1}{2} \beta [\mu \mathbf{H}^* \cdot (\nabla \times \mathbf{H}) + \varepsilon \mathbf{E}^* \cdot (\nabla \times \mathbf{E})] \\ \mathbf{H}^* \cdot (\mathbf{FL}) + \mathbf{E}^* \cdot (\mathbf{AL}) : J + \operatorname{Im} [\nabla \cdot (\mathbf{E} \times \mathbf{H}^*)] \\ - i \frac{1}{2} [(\nabla \times \mathbf{H}^*) \cdot \mathbf{E} + (\nabla \times \mathbf{E}^*) \cdot \mathbf{H}] = \frac{1}{2} \beta [\mu \mathbf{H}^* \cdot (\nabla \times \mathbf{H}) - \varepsilon \mathbf{E}^* \cdot (\nabla \times \mathbf{E})] \end{array} \right. \quad (\text{S2.6})$$

From here on, we assume a medium under consideration to be lossless so that both of  $\{\varepsilon, \mu\}$  are real for simplicity. Furthermore, we take  $\beta$  is real as well so that  $\{\varepsilon, \mu, \beta\} \in \mathbb{R}$ . Our system is henceforth Hermitian. Separating into real and imaginary parts.

$$\begin{aligned} \{\varepsilon, \mu, \beta\} \in \mathbb{R} &\Rightarrow \\ \mathbf{H}^* \cdot (\mathbf{FL}) - \mathbf{E}^* \cdot (\mathbf{AL}) : & \\ \left\{ \begin{array}{l} I = \frac{1}{2} \operatorname{Im} [(\nabla \times \mathbf{H}^*) \cdot \mathbf{E} - (\nabla \times \mathbf{E}^*) \cdot \mathbf{H}] - \frac{1}{2} \beta \operatorname{Re} [\mu \mathbf{H}^* \cdot (\nabla \times \mathbf{H}) + \varepsilon \mathbf{E}^* \cdot (\nabla \times \mathbf{E})] \\ \nabla \cdot \mathbf{P} = -\frac{1}{2} \operatorname{Re} [(\nabla \times \mathbf{H}^*) \cdot \mathbf{E} - (\nabla \times \mathbf{E}^*) \cdot \mathbf{H}] - \frac{1}{2} \beta \operatorname{Im} [\mu \mathbf{H}^* \cdot (\nabla \times \mathbf{H}) + \varepsilon \mathbf{E}^* \cdot (\nabla \times \mathbf{E})] \end{array} \right. & (\text{S2.7}) \\ \mathbf{H}^* \cdot (\mathbf{FL}) + \mathbf{E}^* \cdot (\mathbf{AL}) : & \\ \left\{ \begin{array}{l} J + \nabla \cdot \mathbf{R} \\ = -\frac{1}{2} \operatorname{Im} [(\nabla \times \mathbf{H}^*) \cdot \mathbf{E} + (\nabla \times \mathbf{E}^*) \cdot \mathbf{H}] + \frac{1}{2} \beta \operatorname{Re} [\mu \mathbf{H}^* \cdot (\nabla \times \mathbf{H}) - \varepsilon \mathbf{E}^* \cdot (\nabla \times \mathbf{E})] \\ \frac{1}{2} \operatorname{Re} [(\nabla \times \mathbf{H}^*) \cdot \mathbf{E} + (\nabla \times \mathbf{E}^*) \cdot \mathbf{H}] = -\frac{1}{2} \beta \operatorname{Im} [\mu \mathbf{H}^* \cdot (\nabla \times \mathbf{H}) - \varepsilon \mathbf{E}^* \cdot (\nabla \times \mathbf{E})] \end{array} \right. & \end{aligned}$$

Here, we are prompted to introduce several intermediaries for notational simplicity.

$$\begin{aligned} \left\{ \begin{array}{l} \mathbf{A}_{\pm} \equiv [\mathbf{E}^* \cdot (\nabla \times \mathbf{H}) \mp \mathbf{H}^* \cdot (\nabla \times \mathbf{E})]^* \\ \mathbf{B}_{\pm} \equiv \mu \mathbf{H}^* \cdot (\nabla \times \mathbf{H}) \mp \varepsilon \mathbf{E}^* \cdot (\nabla \times \mathbf{E}) \end{array} \right. &\Rightarrow \\ \left\{ \begin{array}{l} \mathbf{H}^* \cdot (\mathbf{FL}) - \mathbf{E}^* \cdot (\mathbf{AL}) : \left\{ \begin{array}{l} I = \frac{1}{2} \operatorname{Im} (\mathbf{A}_{+}) - \frac{1}{2} \beta \operatorname{Re} (\mathbf{B}_{-}) \\ \nabla \cdot \mathbf{P} = -\frac{1}{2} \operatorname{Re} (\mathbf{A}_{+}) - \frac{1}{2} \beta \operatorname{Im} (\mathbf{B}_{-}) \end{array} \right. \\ \mathbf{H}^* \cdot (\mathbf{FL}) + \mathbf{E}^* \cdot (\mathbf{AL}) : \left\{ \begin{array}{l} J + \nabla \cdot \mathbf{R} = -\frac{1}{2} \operatorname{Im} (\mathbf{A}_{-}) + \frac{1}{2} \beta \operatorname{Re} (\mathbf{B}_{+}) \\ \operatorname{Re} (\mathbf{A}_{-}) + \beta \operatorname{Im} (\mathbf{B}_{+}) = 0 \end{array} \right. \end{array} \right. & (\text{S2.8}) \end{aligned}$$

For an achiral medium with  $\beta = 0$  for a curl- $\beta$ -based constitutive relations, we have a physically meaningful reduced set as follows.

$$\begin{aligned} \beta = 0 &\Rightarrow \left\{ \begin{array}{l} \nabla \times \mathbf{E} = i\mu \mathbf{H} \\ \nabla \times \mathbf{H} = -i\varepsilon \mathbf{E} \end{array} \right\} \Rightarrow \left\{ \begin{array}{l} \nabla \cdot \mathbf{E} = 0 \\ \nabla \cdot \mathbf{H} = 0 \end{array} \right\} \\ \mathbf{B}_{+} &\equiv \mu \mathbf{H}^* \cdot (\nabla \times \mathbf{H}) - \varepsilon \mathbf{E}^* \cdot (\nabla \times \mathbf{E}) = \mu \mathbf{H}^* \cdot (-i\varepsilon \mathbf{E}) - \varepsilon \mathbf{E}^* \cdot (i\mu \mathbf{H}) \\ &= i\varepsilon \mu (\mathbf{H}^* \cdot \mathbf{E} + \mathbf{E}^* \cdot \mathbf{H}) = 2i\varepsilon \mu \operatorname{Re} (\mathbf{E} \cdot \mathbf{H}^*) \equiv 2i\varepsilon \mu \mathcal{K} \\ \mathbf{B}_{-} &\equiv \mu \mathbf{H}^* \cdot (\nabla \times \mathbf{H}) + \varepsilon \mathbf{E}^* \cdot (\nabla \times \mathbf{E}) = \mu \mathbf{H}^* \cdot (-i\varepsilon \mathbf{E}) + \varepsilon \mathbf{E}^* \cdot (i\mu \mathbf{H}) \\ &= i\varepsilon \mu (\mathbf{E}^* \cdot \mathbf{H} - \mathbf{H}^* \cdot \mathbf{E}) = i\varepsilon \mu 2i \operatorname{Im} (\mathbf{E}^* \cdot \mathbf{H}) = -2\varepsilon \mu \operatorname{Im} (\mathbf{E}^* \cdot \mathbf{H}) = 2\varepsilon \mu \operatorname{Im} (\mathbf{E} \cdot \mathbf{H}^*) \equiv 2\varepsilon \mu \mathcal{L} \\ \left\{ \begin{array}{l} \mathbf{B}_{+} = 2i\varepsilon \mu \mathcal{K} \\ \mathbf{B}_{-} = 2\varepsilon \mu \mathcal{L} \end{array} \right. &\Rightarrow \{\mathbf{B}_{+}, \mathbf{B}_{-}\} = 2\varepsilon \mu \{i\mathcal{K}, \mathcal{L}\} \Rightarrow \mathbf{B}_{-} + \mathbf{B}_{+} = 2\varepsilon \mu (\mathcal{L} + i\mathcal{K}) \end{aligned} \quad (\text{S2.9})$$

We make sure that the achiral limit leads to a correct simple set.

$$\begin{aligned}
\beta = 0 \Rightarrow & \begin{cases} \nabla \times \mathbf{E} = i\mu \mathbf{H} \\ \nabla \times \mathbf{H} = -i\varepsilon \mathbf{E} \end{cases}, \begin{cases} \nabla \cdot \mathbf{E} = 0 \\ \nabla \cdot \mathbf{H} = 0 \end{cases} \Rightarrow \Rightarrow \begin{cases} \mathbf{H}^* \cdot (\mathbf{FL}) - \mathbf{E}^* \cdot (\mathbf{AL}) : \\ \mathbf{H}^* \cdot (\mathbf{FL}) + \mathbf{E}^* \cdot (\mathbf{AL}) : \end{cases} \\
\begin{cases} \mathbf{A}_+ \equiv (\nabla \times \mathbf{H}^*) \cdot \mathbf{E} - (\nabla \times \mathbf{E}^*) \cdot \mathbf{H} = (i\varepsilon \mathbf{E}^*) \cdot \mathbf{E} - (-i\mu \mathbf{H}^*) \cdot \mathbf{H} = 2iI \\ \mathbf{A}_- \equiv (\nabla \times \mathbf{H}^*) \cdot \mathbf{E} + (\nabla \times \mathbf{E}^*) \cdot \mathbf{H} = (i\varepsilon \mathbf{E}^*) \cdot \mathbf{E} + (-i\mu \mathbf{H}^*) \cdot \mathbf{H} = 2iJ \end{cases} \Rightarrow & . \quad (\text{s2.10}) \\
\begin{cases} \mathbf{H}^* \cdot (\mathbf{FL}) - \mathbf{E}^* \cdot (\mathbf{AL}) : \\ \mathbf{H}^* \cdot (\mathbf{FL}) + \mathbf{E}^* \cdot (\mathbf{AL}) : \end{cases} \begin{cases} I = I \\ \nabla \cdot \mathbf{P} = 0 \\ J + \nabla \cdot \mathbf{R} = -J \\ 0 = 0 \end{cases}
\end{aligned}$$

Let us verify the reduction to achiral media by utilizing the Maxwell equations transformed into the following dimensionless forms.

$$\begin{aligned}
\beta = \kappa = 0 \Rightarrow & \begin{cases} \nabla \times \mathbf{E} = i\mu \mathbf{H} \\ \nabla \times \mathbf{H} = -i\varepsilon \mathbf{E} \end{cases}, \begin{cases} \nabla \cdot \mathbf{E} = 0 \\ \nabla \cdot \mathbf{H} = 0 \end{cases} \Rightarrow \\
\mathbf{B}_\pm \equiv \mu \mathbf{H}^* \cdot (\nabla \times \mathbf{H}) \mp \varepsilon \mathbf{E}^* \cdot (\nabla \times \mathbf{E}) \Rightarrow & \\
\mathbf{B}_+ + \mathbf{B}_- = 2\mu \mathbf{H}^* \cdot (\nabla \times \mathbf{H}) = 2\mu \mathbf{H}^* \cdot (-i\varepsilon \mathbf{E}) = -i2\varepsilon\mu \mathbf{E} \cdot \mathbf{H}^* & \\
\begin{cases} \mathbf{B}_+ \equiv \mu \mathbf{H}^* \cdot (\nabla \times \mathbf{H}) - \varepsilon \mathbf{E}^* \cdot (\nabla \times \mathbf{E}) = \mu \mathbf{H}^* \cdot (-i\varepsilon \mathbf{E}) - \varepsilon \mathbf{E}^* \cdot (i\mu \mathbf{H}) \\ \quad = -i\varepsilon\mu (\mathbf{E} \cdot \mathbf{H}^* + \mathbf{E}^* \cdot \mathbf{H}) = -i2\varepsilon\mu \text{Re}(\mathbf{E} \cdot \mathbf{H}^*) \equiv -i2\varepsilon\mu \mathcal{K} \\ \mathbf{B}_- \equiv \mu \mathbf{H}^* \cdot (\nabla \times \mathbf{H}) + \varepsilon \mathbf{E}^* \cdot (\nabla \times \mathbf{E}) = \mu \mathbf{H}^* \cdot (-i\varepsilon \mathbf{E}) + \varepsilon \mathbf{E}^* \cdot (i\mu \mathbf{H}) \\ \quad = -i\varepsilon\mu (\mathbf{E} \cdot \mathbf{H}^* - \mathbf{E}^* \cdot \mathbf{H}) = 2\varepsilon\mu \text{Im}(\mathbf{E} \cdot \mathbf{H}^*) \equiv 2\varepsilon\mu \mathcal{C} \end{cases} & . \quad (\text{s2.11})
\end{aligned}$$

We thus find that  $\{\mathbf{B}_+, \mathbf{B}_-\}$  are a pure imaginary parameter and a pure real parameter, respectively.

### Section S3. Energy conservation laws for field-based constitutive relations

For a chiral media with the field-  $\kappa$ -based constitutive relations, let us examine the Maxwell equations.

$$\begin{aligned}
\begin{cases} \nabla \cdot \mathbf{E} = 0 \\ \nabla \cdot \mathbf{H} = 0 \end{cases}, \begin{cases} \mathbf{D} = \varepsilon \mathbf{E} + i\kappa \mathbf{H} \\ \mathbf{B} = \mu \mathbf{H} - i\kappa \mathbf{E} \end{cases} \Rightarrow \begin{cases} \nabla \times \mathbf{E} = i\mathbf{B} \\ \nabla \times \mathbf{H} = -i\mathbf{D} \end{cases} \Rightarrow \begin{cases} \nabla \times \mathbf{E} = i\mu \mathbf{H} + \kappa \mathbf{E} \\ \nabla \times \mathbf{H} = -i\varepsilon \mathbf{E} + \kappa \mathbf{H} \end{cases} \\
K = \begin{pmatrix} \kappa & i\mu \\ -i\varepsilon & \kappa \end{pmatrix} \Rightarrow K^{-1} = \frac{1}{\kappa^2 - \varepsilon\mu} \begin{pmatrix} \kappa & -i\mu \\ i\varepsilon & \kappa \end{pmatrix} \Rightarrow & . \quad (\text{S3.1}) \\
\nabla \times \begin{Bmatrix} \mathbf{E} \\ \mathbf{H} \end{Bmatrix} = K \begin{Bmatrix} \mathbf{E} \\ \mathbf{H} \end{Bmatrix} \Rightarrow \begin{Bmatrix} \mathbf{E} \\ \mathbf{H} \end{Bmatrix} = K^{-1} \nabla \times \begin{Bmatrix} \mathbf{E} \\ \mathbf{H} \end{Bmatrix} = \frac{1}{\kappa^2 - \varepsilon\mu} \begin{Bmatrix} \kappa(\nabla \times \mathbf{E}) - i\mu(\nabla \times \mathbf{H}) \\ i\varepsilon(\nabla \times \mathbf{E}) + \kappa(\nabla \times \mathbf{H}) \end{Bmatrix}
\end{aligned}$$

This portion will be a little simpler than that for the curl-based constitutive relations. Let us rework the sum and difference for the energy conservation laws.

$$\begin{aligned}
& \begin{cases} \nabla \times \mathbf{E} = i\mu \mathbf{H} + \kappa \mathbf{E} \\ \nabla \times \mathbf{H} = -i\varepsilon \mathbf{E} + \kappa \mathbf{H} \end{cases} \Rightarrow \begin{cases} \mathbf{H}^* \cdot (\mathbf{FL}) - \mathbf{E}^* \cdot (\mathbf{AL}) : \\ \mathbf{H}^* \cdot (\mathbf{FL}) + \mathbf{E}^* \cdot (\mathbf{AL}) : \end{cases} \\
& \begin{cases} (\mathbf{FL}) : \nabla \times \mathbf{E} = i\mu \mathbf{H} + \kappa \mathbf{E} \\ (\mathbf{AL}) : \nabla \times \mathbf{H} = -i\varepsilon \mathbf{E} + \kappa \mathbf{H} \end{cases} \Rightarrow \begin{cases} \mathbf{H}^* \cdot (\mathbf{FL}) : (\nabla \times \mathbf{E}) \cdot \mathbf{H}^* = i\mu \mathbf{H}^* \cdot \mathbf{H} + \kappa \mathbf{E} \cdot \mathbf{H}^* \\ \mathbf{E}^* \cdot (\mathbf{AL}) : (\nabla \times \mathbf{H}) \cdot \mathbf{E}^* = -i\varepsilon \mathbf{E}^* \cdot \mathbf{E} + \kappa \mathbf{E}^* \cdot \mathbf{H} \end{cases} \quad (S3.2) \\
& \begin{cases} \mathbf{H}^* \cdot (\mathbf{FL}) - \mathbf{E}^* \cdot (\mathbf{AL}) : (\nabla \times \mathbf{E}) \cdot \mathbf{H}^* - (\nabla \times \mathbf{H}) \cdot \mathbf{E}^* = i\varepsilon \mathbf{E}^* \cdot \mathbf{E} + i\mu \mathbf{H}^* \cdot \mathbf{H} + \kappa (\mathbf{E} \cdot \mathbf{H}^* - \mathbf{E}^* \cdot \mathbf{H}) \\ \mathbf{H}^* \cdot (\mathbf{FL}) + \mathbf{E}^* \cdot (\mathbf{AL}) : (\nabla \times \mathbf{E}) \cdot \mathbf{H}^* + (\nabla \times \mathbf{H}) \cdot \mathbf{E}^* = -i\varepsilon \mathbf{E}^* \cdot \mathbf{E} + i\mu \mathbf{H}^* \cdot \mathbf{H} + \kappa (\mathbf{E} \cdot \mathbf{H}^* + \mathbf{E}^* \cdot \mathbf{H}) \end{cases}
\end{aligned}$$

We introduce average sum and average difference.

$$\begin{aligned}
& \begin{cases} I \equiv \frac{1}{2}(\varepsilon \mathbf{E}^* \cdot \mathbf{E} + \mu \mathbf{H}^* \cdot \mathbf{H}) \\ J \equiv \frac{1}{2}(\varepsilon \mathbf{E}^* \cdot \mathbf{E} - \mu \mathbf{H}^* \cdot \mathbf{H}) \end{cases} \Rightarrow \begin{cases} \mathbf{H}^* \cdot (\mathbf{FL}) - \mathbf{E}^* \cdot (\mathbf{AL}) : \\ \mathbf{H}^* \cdot (\mathbf{FL}) + \mathbf{E}^* \cdot (\mathbf{AL}) : \end{cases} \\
& \begin{cases} \mathbf{H}^* \cdot (\mathbf{FL}) - \mathbf{E}^* \cdot (\mathbf{AL}) : \frac{1}{2}[(\nabla \times \mathbf{E}) \cdot \mathbf{H}^* - (\nabla \times \mathbf{H}) \cdot \mathbf{E}^*] = iI + i\kappa \text{Im}(\mathbf{E} \cdot \mathbf{H}^*) \\ \mathbf{H}^* \cdot (\mathbf{FL}) + \mathbf{E}^* \cdot (\mathbf{AL}) : \frac{1}{2}[(\nabla \times \mathbf{E}) \cdot \mathbf{H}^* + (\nabla \times \mathbf{H}) \cdot \mathbf{E}^*] = -iJ + \kappa \text{Re}(\mathbf{E} \cdot \mathbf{H}^*) \end{cases} \quad (S3.3) \\
& \begin{cases} \mathbf{H}^* \cdot (\mathbf{FL}) - \mathbf{E}^* \cdot (\mathbf{AL}) : -iI + \frac{1}{2}[(\nabla \times \mathbf{E}) \cdot \mathbf{H}^* - (\nabla \times \mathbf{H}) \cdot \mathbf{E}^*] = i\kappa \text{Im}(\mathbf{E} \cdot \mathbf{H}^*) \\ \mathbf{H}^* \cdot (\mathbf{FL}) + \mathbf{E}^* \cdot (\mathbf{AL}) : +iJ + \frac{1}{2}[(\nabla \times \mathbf{E}) \cdot \mathbf{H}^* + (\nabla \times \mathbf{H}) \cdot \mathbf{E}^*] = \kappa \text{Re}(\mathbf{E} \cdot \mathbf{H}^*) \end{cases} \\
& \begin{cases} \mathbf{H}^* \cdot (\mathbf{FL}) - \mathbf{E}^* \cdot (\mathbf{AL}) : I + i\frac{1}{2}[(\nabla \times \mathbf{E}) \cdot \mathbf{H}^* - (\nabla \times \mathbf{H}) \cdot \mathbf{E}^*] = -\kappa \text{Im}(\mathbf{E} \cdot \mathbf{H}^*) \\ \mathbf{H}^* \cdot (\mathbf{FL}) + \mathbf{E}^* \cdot (\mathbf{AL}) : J - i\frac{1}{2}[(\nabla \times \mathbf{E}) \cdot \mathbf{H}^* + (\nabla \times \mathbf{H}) \cdot \mathbf{E}^*] = -i\kappa \text{Re}(\mathbf{E} \cdot \mathbf{H}^*) \end{cases}
\end{aligned}$$

The formations with the field-based constitutive relations look simpler than those with the curl-based constitutive relations.

Meanwhile, we make use of the set of dot and cross products. Taking difference and sum, we can prepare for the Poynting vectors. Applying vector identities,

$$\begin{aligned}
& \begin{cases} \mathbf{A} \times (\nabla \times \mathbf{B}) = \mathbf{A} \cdot (\nabla) \mathbf{B} - (\mathbf{A} \cdot \nabla) \mathbf{B} \\ \nabla \times (\nabla \times \mathbf{A}) = \nabla (\nabla \cdot \mathbf{A}) - \nabla^2 \mathbf{A} \\ \nabla \cdot (\mathbf{A} \times \mathbf{B}) = (\nabla \times \mathbf{A}) \cdot \mathbf{B} - (\nabla \times \mathbf{B}) \cdot \mathbf{A} \end{cases} \Rightarrow \begin{cases} \mathbf{H}^* \cdot (\mathbf{FL}) - \mathbf{E}^* \cdot (\mathbf{AL}) : \\ \mathbf{H}^* \cdot (\mathbf{FL}) + \mathbf{E}^* \cdot (\mathbf{AL}) : \end{cases} \\
& \begin{cases} dif : (\nabla \times \mathbf{E}) \cdot \mathbf{H}^* + (\nabla \times \mathbf{H}) \cdot \mathbf{E}^* = \nabla \cdot (\mathbf{E} \times \mathbf{H}^*) - \nabla \cdot (\mathbf{E}^* \times \mathbf{H}) + (\nabla \times \mathbf{H}^*) \cdot \mathbf{E} + (\nabla \times \mathbf{E}^*) \cdot \mathbf{H} \\ sum : (\nabla \times \mathbf{E}) \cdot \mathbf{H}^* - (\nabla \times \mathbf{H}) \cdot \mathbf{E}^* = \nabla \cdot (\mathbf{E} \times \mathbf{H}^*) + \nabla \cdot (\mathbf{E}^* \times \mathbf{H}) + (\nabla \times \mathbf{H}^*) \cdot \mathbf{E} - (\nabla \times \mathbf{E}^*) \cdot \mathbf{H} \end{cases} \\
& \begin{cases} \mathbf{H}^* \cdot (\mathbf{FL}) - \mathbf{E}^* \cdot (\mathbf{AL}) : I + i\frac{1}{2}[(\nabla \times \mathbf{E}) \cdot \mathbf{H}^* - (\nabla \times \mathbf{H}) \cdot \mathbf{E}^*] = -\kappa \text{Im}(\mathbf{E} \cdot \mathbf{H}^*) \\ \mathbf{H}^* \cdot (\mathbf{FL}) + \mathbf{E}^* \cdot (\mathbf{AL}) : J - i\frac{1}{2}[(\nabla \times \mathbf{E}) \cdot \mathbf{H}^* + (\nabla \times \mathbf{H}) \cdot \mathbf{E}^*] = -i\kappa \text{Re}(\mathbf{E} \cdot \mathbf{H}^*) \end{cases} \\
& \begin{cases} \mathbf{H}^* \cdot (\mathbf{FL}) - \mathbf{E}^* \cdot (\mathbf{AL}) : I + i\frac{1}{2} \left[ \nabla \cdot (\mathbf{E} \times \mathbf{H}^*) + \nabla \cdot (\mathbf{E}^* \times \mathbf{H}) + (\nabla \times \mathbf{H}^*) \cdot \mathbf{E} - (\nabla \times \mathbf{E}^*) \cdot \mathbf{H} \right] = -\kappa \text{Im}(\mathbf{E} \cdot \mathbf{H}^*) \\ \mathbf{H}^* \cdot (\mathbf{FL}) + \mathbf{E}^* \cdot (\mathbf{AL}) : J - i\frac{1}{2} \left[ \nabla \cdot (\mathbf{E} \times \mathbf{H}^*) - \nabla \cdot (\mathbf{E}^* \times \mathbf{H}) + (\nabla \times \mathbf{H}^*) \cdot \mathbf{E} + (\nabla \times \mathbf{E}^*) \cdot \mathbf{H} \right] = -i\kappa \text{Re}(\mathbf{E} \cdot \mathbf{H}^*) \end{cases} \\
& \begin{cases} \mathbf{H}^* \cdot (\mathbf{FL}) - \mathbf{E}^* \cdot (\mathbf{AL}) : \\ I + i\frac{1}{2} [\nabla \cdot (\mathbf{E} \times \mathbf{H}^*) + \nabla \cdot (\mathbf{E}^* \times \mathbf{H})] + i\frac{1}{2} [(\nabla \times \mathbf{H}^*) \cdot \mathbf{E} - (\nabla \times \mathbf{E}^*) \cdot \mathbf{H}] = -\kappa \text{Im}(\mathbf{E} \cdot \mathbf{H}^*) \\ \mathbf{H}^* \cdot (\mathbf{FL}) + \mathbf{E}^* \cdot (\mathbf{AL}) : \\ J - i\frac{1}{2} [\nabla \cdot (\mathbf{E} \times \mathbf{H}^*) - \nabla \cdot (\mathbf{E}^* \times \mathbf{H})] - i\frac{1}{2} [(\nabla \times \mathbf{H}^*) \cdot \mathbf{E} + (\nabla \times \mathbf{E}^*) \cdot \mathbf{H}] = -i\kappa \text{Re}(\mathbf{E} \cdot \mathbf{H}^*) \end{cases} \quad (S3.4)
\end{aligned}$$



Let us separate the above pair respectively into the following real and imaginary parts, while introducing the following pairs of auxiliary vectors.

$$\begin{aligned}
& \begin{cases} \mathbf{P} \equiv \text{Re}(\mathbf{E} \times \mathbf{H}^*) \\ \mathbf{R} \equiv \text{Im}(\mathbf{E} \times \mathbf{H}^*) \end{cases}, \quad \begin{cases} \mathbf{A}_\pm \equiv [\mathbf{E}^* \cdot (\nabla \times \mathbf{H}) \mp \mathbf{H}^* \cdot (\nabla \times \mathbf{E})]^* \\ \mathbf{B}_\pm \equiv \mu \mathbf{H}^* \cdot (\nabla \times \mathbf{H}) \mp \varepsilon \mathbf{E}^* \cdot (\nabla \times \mathbf{E}) \end{cases} \Rightarrow \begin{cases} \mathbf{H}^* \cdot (\mathbf{FL}) - \mathbf{E}^* \cdot (\mathbf{AL}): \\ \mathbf{H}^* \cdot (\mathbf{FL}) + \mathbf{E}^* \cdot (\mathbf{AL}): \end{cases} \\
& \begin{cases} \mathbf{H}^* \cdot (\mathbf{FL}) - \mathbf{E}^* \cdot (\mathbf{AL}): & I + i \nabla \cdot \mathbf{P} + i \frac{1}{2} \mathbf{A}_+ = -\kappa \text{Im}(\mathbf{E} \cdot \mathbf{H}^*) \\ \mathbf{H}^* \cdot (\mathbf{FL}) + \mathbf{E}^* \cdot (\mathbf{AL}): & J + \nabla \cdot \mathbf{R} - i \frac{1}{2} \mathbf{A}_- = -i \kappa \text{Re}(\mathbf{E} \cdot \mathbf{H}^*) \end{cases} \quad . \quad (\text{S3.5}) \\
& \begin{cases} \mathbf{H}^* \cdot (\mathbf{FL}) - \mathbf{E}^* \cdot (\mathbf{AL}): & \begin{cases} I - \frac{1}{2} \text{Im}(\mathbf{A}_+) = -\kappa \text{Im}(\mathbf{E} \cdot \mathbf{H}^*) \\ \nabla \cdot \mathbf{P} + \frac{1}{2} \text{Re}(\mathbf{A}_+) = 0 \end{cases} \\ \mathbf{H}^* \cdot (\mathbf{FL}) + \mathbf{E}^* \cdot (\mathbf{AL}): & \begin{cases} J + \nabla \cdot \mathbf{R} + \frac{1}{2} \text{Im}(\mathbf{A}_-) = 0 \\ \frac{1}{2} \text{Re}(\mathbf{A}_-) = \kappa \text{Re}(\mathbf{E} \cdot \mathbf{H}^*) \end{cases} \end{cases}
\end{aligned}$$

Let us verify the reduction to achiral media. Likewise, the Maxwell equations get transformed into the following dimensionless forms.

$$\begin{aligned}
& \kappa = 0 \Rightarrow \begin{cases} \nabla \times \mathbf{E} = i \mu \mathbf{H} \\ \nabla \times \mathbf{H} = -i \varepsilon \mathbf{E} \end{cases}, \quad \begin{cases} \nabla \cdot \mathbf{E} = 0 \\ \nabla \cdot \mathbf{H} = 0 \end{cases} \Rightarrow \Rightarrow \begin{cases} \mathbf{H}^* \cdot (\mathbf{FL}) - \mathbf{E}^* \cdot (\mathbf{AL}): \\ \mathbf{H}^* \cdot (\mathbf{FL}) + \mathbf{E}^* \cdot (\mathbf{AL}): \end{cases} \\
& \begin{cases} \mathbf{A}_+ \equiv (\nabla \times \mathbf{H}^*) \cdot \mathbf{E} - (\nabla \times \mathbf{E}^*) \cdot \mathbf{H} = (i \varepsilon \mathbf{E}^*) \cdot \mathbf{E} - (-i \mu \mathbf{H}^*) \cdot \mathbf{H} = 2iI \\ \mathbf{A}_- \equiv (\nabla \times \mathbf{H}^*) \cdot \mathbf{E} + (\nabla \times \mathbf{E}^*) \cdot \mathbf{H} = (i \varepsilon \mathbf{E}^*) \cdot \mathbf{E} + (-i \mu \mathbf{H}^*) \cdot \mathbf{H} = 2iJ \end{cases} \Rightarrow \quad . \quad (\text{S3.6}) \\
& \begin{cases} \mathbf{H}^* \cdot (\mathbf{FL}) - \mathbf{E}^* \cdot (\mathbf{AL}): & \begin{cases} I = I \\ \nabla \cdot \mathbf{P} = 0 \end{cases} \\ \mathbf{H}^* \cdot (\mathbf{FL}) + \mathbf{E}^* \cdot (\mathbf{AL}): & \begin{cases} J + \nabla \cdot \mathbf{R} + J = 0 \\ 0 = 0 \end{cases} \end{cases} \Rightarrow \begin{cases} \nabla \cdot \mathbf{P} = 0 \\ \nabla \cdot \mathbf{R} + 2J = 0 \end{cases}
\end{aligned}$$

#### Section S4. Decompositions of the Poynting vectors

We define the vectors  $\mathbf{T}_\pm$ , while making use of the vector equality valid for the gradient  $\nabla J$  of the reactive energy  $J$  defined in the main text.

$$\begin{aligned}
& \begin{cases} \mathbf{T}_+ \equiv \mathbf{H}^* \cdot (\nabla) \mathbf{E} - \mathbf{E}^* \cdot (\nabla) \mathbf{H} + (\mathbf{E}^* \cdot \nabla) \mathbf{H} - (\mathbf{H}^* \cdot \nabla) \mathbf{E} \\ \mathbf{T}_- \equiv \mathbf{E}^* \cdot (\nabla) \mathbf{H} + \mathbf{H}^* \cdot (\nabla) \mathbf{E} - (\mathbf{E}^* \cdot \nabla) \mathbf{H} - (\mathbf{H}^* \cdot \nabla) \mathbf{E} \end{cases} \\
& \text{Re}[\varepsilon \mathbf{E}^* \cdot (\nabla) \mathbf{E} - \mu \mathbf{H}^* \cdot (\nabla) \mathbf{H}] \quad . \quad (\text{S4.1}) \\
& = \varepsilon \nabla \left( \frac{1}{2} |\mathbf{E}|^2 \right) - \mu \nabla \left( \frac{1}{2} |\mathbf{H}|^2 \right) \equiv \nabla \left[ \frac{1}{2} (\varepsilon |\mathbf{E}|^2 - \mu |\mathbf{H}|^2) \right] \equiv \nabla J
\end{aligned}$$

The matrix relation  $\{\mathbf{E}, \mathbf{H}\} = K^{-1} \nabla \times \{\mathbf{E}, \mathbf{H}\}$  with Eq. (s08) is combined with the vector identity  $\mathbf{M} \times (\nabla \times \mathbf{N}) = \mathbf{M} \cdot (\nabla) \mathbf{N} - (\mathbf{M} \cdot \nabla) \mathbf{N}$  for any  $\{\mathbf{M}, \mathbf{N}\}$  in obtaining the following decomposition rules for the curl- $\beta$ -based constitutive relations with  $\varepsilon, \mu, \beta \in \mathbb{R}$ .

For a chiral media with the curl- $\beta$ -based constitutive relations, let us examine the complex Poynting vector. There are both self-terms  $\{\mathbf{E} \times (\nabla \times \mathbf{E}^*), (\nabla \times \mathbf{H}) \times \mathbf{H}^*\}$  and cross-terms  $\{\mathbf{E} \times (\nabla \times \mathbf{H}^*), (\nabla \times \mathbf{E}) \times \mathbf{H}^*\}$  for the complex Poynting vector when expanded as follows.

$$\begin{cases} \mathbf{P} + i\mathbf{R} \equiv \mathbf{E} \times \mathbf{H}^* = \mathbf{E} \times \left[ -i\frac{1}{\mu}(\nabla \times \mathbf{E}) - \beta(\nabla \times \mathbf{H}) \right]^* = i\frac{1}{\mu} \mathbf{E} \times (\nabla \times \mathbf{E}^*) - \beta \mathbf{E} \times (\nabla \times \mathbf{H}^*) \\ \mathbf{P} + i\mathbf{R} \equiv \mathbf{E} \times \mathbf{H}^* = \left[ -\beta(\nabla \times \mathbf{E}) + i\frac{1}{\varepsilon}(\nabla \times \mathbf{H}) \right] \times \mathbf{H}^* = -\beta(\nabla \times \mathbf{E}) \times \mathbf{H}^* + i\frac{1}{\varepsilon}(\nabla \times \mathbf{H}) \times \mathbf{H}^* \end{cases} \quad (\text{S4.2})$$

Both cross-terms carry the chirality parameter  $\beta \neq 0$  as should do. There are two ways that are suitable for the electric-magnetic democracy.

$$\begin{aligned} \mathbf{A} \times (\nabla \times \mathbf{B}) &= \mathbf{A} \cdot (\nabla) \mathbf{B} - (\mathbf{A} \cdot \nabla) \mathbf{B} \Rightarrow \\ \mathbf{P} + i\mathbf{R} \equiv \mathbf{E} \times \mathbf{H}^* &= i\frac{1}{\mu} \mathbf{E} \times (\nabla \times \mathbf{E}^*) - \beta \mathbf{E} \times (\nabla \times \mathbf{H}^*) \\ &= i\frac{1}{\mu} [\mathbf{E} \cdot (\nabla) \mathbf{E}^* - (\mathbf{E} \cdot \nabla) \mathbf{E}^*] - \beta [\mathbf{E} \cdot (\nabla) \mathbf{H}^* - (\mathbf{E} \cdot \nabla) \mathbf{H}^*] \quad (\text{S4.3}) \\ \mathbf{P} + i\mathbf{R} \equiv \mathbf{E} \times \mathbf{H}^* &= -\beta(\nabla \times \mathbf{E}) \times \mathbf{H}^* + i\frac{1}{\varepsilon}(\nabla \times \mathbf{H}) \times \mathbf{H}^* = \beta \mathbf{H}^* \times (\nabla \times \mathbf{E}) - i\frac{1}{\varepsilon} \mathbf{H}^* \times (\nabla \times \mathbf{H}) \\ &= -i\frac{1}{\varepsilon} [\mathbf{H}^* \cdot (\nabla) \mathbf{H} - (\mathbf{H}^* \cdot \nabla) \mathbf{H}] + \beta [\mathbf{H}^* \cdot (\nabla) \mathbf{E} - (\mathbf{H}^* \cdot \nabla) \mathbf{E}] \end{aligned}$$

Resultantly, the decomposition of the Poynting vector gets complicated. Notwithstanding, we still discover the orbital-like and spin-like parts. The EM and reactive Poynting vectors are separated as follows in two ways (electric-based versus magnetic-based), when taking the real and imaginary parts of the above pair of formulas.

$$\begin{cases} \mathbf{P} \equiv \text{Re}(\mathbf{E} \times \mathbf{H}^*) = -\text{Im} \left\{ \frac{1}{\mu} [\mathbf{E} \cdot (\nabla) \mathbf{E}^* - (\mathbf{E} \cdot \nabla) \mathbf{E}^*] \right\} - \text{Re} \left\{ \beta [\mathbf{E} \cdot (\nabla) \mathbf{H}^* - (\mathbf{E} \cdot \nabla) \mathbf{H}^*] \right\} \\ = \text{Im} \left\{ \frac{1}{\mu} [\mathbf{E}^* \cdot (\nabla) \mathbf{E} - (\mathbf{E}^* \cdot \nabla) \mathbf{E}] \right\} - \text{Re} \left\{ \beta [\mathbf{E}^* \cdot (\nabla) \mathbf{H} - (\mathbf{E}^* \cdot \nabla) \mathbf{H}] \right\} \\ \mathbf{R} \equiv \text{Im}(\mathbf{E} \times \mathbf{H}^*) = \text{Re} \left\{ \frac{1}{\mu} [\mathbf{E} \cdot (\nabla) \mathbf{E}^* - (\mathbf{E} \cdot \nabla) \mathbf{E}^*] \right\} - \text{Im} \left\{ \beta [\mathbf{E} \cdot (\nabla) \mathbf{H}^* - (\mathbf{E} \cdot \nabla) \mathbf{H}^*] \right\} \\ = \text{Re} \left\{ \frac{1}{\mu} [\mathbf{E}^* \cdot (\nabla) \mathbf{E} - (\mathbf{E}^* \cdot \nabla) \mathbf{E}] \right\} + \text{Im} \left\{ \beta [\mathbf{E}^* \cdot (\nabla) \mathbf{H} - (\mathbf{E}^* \cdot \nabla) \mathbf{H}] \right\} \end{cases} \quad (\text{S4.4})$$

Meanwhile,

$$\begin{cases} \mathbf{P} \equiv \text{Re}(\mathbf{E} \times \mathbf{H}^*) = \text{Im} \left\{ \frac{1}{\varepsilon} [\mathbf{H}^* \cdot (\nabla) \mathbf{H} - (\mathbf{H}^* \cdot \nabla) \mathbf{H}] \right\} + \text{Re} \left\{ \beta [\mathbf{H}^* \cdot (\nabla) \mathbf{E} - (\mathbf{H}^* \cdot \nabla) \mathbf{E}] \right\} \\ \mathbf{R} \equiv \text{Im}(\mathbf{E} \times \mathbf{H}^*) = -\text{Re} \left\{ \frac{1}{\varepsilon} [\mathbf{H}^* \cdot (\nabla) \mathbf{H} - (\mathbf{H}^* \cdot \nabla) \mathbf{H}] \right\} + \text{Im} \left\{ \beta [\mathbf{H}^* \cdot (\nabla) \mathbf{E} - (\mathbf{H}^* \cdot \nabla) \mathbf{E}] \right\} \end{cases} \quad (\text{S4.5})$$

Therefore, we encounter additional terms due to optical chirality. Taking the averages of the two respective pairs, we get the followings.

$$\begin{cases}
\mathbf{P} = \frac{1}{2} \text{Im} \left\{ \frac{1}{\mu} [\mathbf{E}^* \cdot (\nabla) \mathbf{E} - (\mathbf{E}^* \cdot \nabla) \mathbf{E}] \right. \\
\left. + \frac{1}{\varepsilon} [\mathbf{H}^* \cdot (\nabla) \mathbf{H} - (\mathbf{H}^* \cdot \nabla) \mathbf{H}] \right\} + \frac{1}{2} \text{Re} \left\{ \beta [\mathbf{H}^* \cdot (\nabla) \mathbf{E} - (\mathbf{H}^* \cdot \nabla) \mathbf{E}] \right. \\
\left. - \beta [\mathbf{E}^* \cdot (\nabla) \mathbf{H} - (\mathbf{E}^* \cdot \nabla) \mathbf{H}] \right\} \\
\mathbf{R} = \frac{1}{2} \text{Re} \left\{ \frac{1}{\mu} [\mathbf{E}^* \cdot (\nabla) \mathbf{E} - (\mathbf{E}^* \cdot \nabla) \mathbf{E}] \right. \\
\left. - \frac{1}{\varepsilon} [\mathbf{H}^* \cdot (\nabla) \mathbf{H} - (\mathbf{H}^* \cdot \nabla) \mathbf{H}] \right\} + \frac{1}{2} \text{Im} \left\{ \beta [\mathbf{E}^* \cdot (\nabla) \mathbf{H} - (\mathbf{E}^* \cdot \nabla) \mathbf{H}] \right. \\
\left. + \beta [\mathbf{H}^* \cdot (\nabla) \mathbf{E} - (\mathbf{H}^* \cdot \nabla) \mathbf{E}] \right\}
\end{cases} \quad (\text{S4.6})$$

In terms of the short-hand notations  $\{\mathbf{O}_\beta, \mathbf{S}_\beta, J, \mathbf{T}_\pm\}$ , we obtain the following concise set.

$$C_\beta^{\text{curl}} : \begin{cases}
\mathbf{O}_\beta \equiv \frac{1}{2} \text{Im} [\mu^{-1} \mathbf{E}^* \cdot (\nabla) \mathbf{E} + \varepsilon^{-1} \mathbf{H}^* \cdot (\nabla) \mathbf{H}] \\
\mathbf{S}_\beta \equiv -\frac{1}{2} \text{Im} [\mu^{-1} (\mathbf{E}^* \cdot \nabla) \mathbf{E} + \varepsilon^{-1} (\mathbf{H}^* \cdot \nabla) \mathbf{H}] \\
\mathbf{P} = \mathbf{O}_\beta + \mathbf{S}_\beta + \frac{1}{2} \beta \text{Re}(\mathbf{T}_+) \\
\mathbf{R} = \frac{1}{2} (\varepsilon \mu)^{-1} \nabla J + \frac{1}{2} \text{Re} [\varepsilon^{-1} (\mathbf{H}^* \cdot \nabla) \mathbf{H} - \mu^{-1} (\mathbf{E}^* \cdot \nabla) \mathbf{E}] + \frac{1}{2} \beta \text{Im}(\mathbf{T}_-)
\end{cases} \quad (\text{S4.7})$$

Meanwhile, for the field- $\kappa$ -based constitutive relations with  $\varepsilon, \mu, \kappa \in \mathbb{R}$ , we obtain the following decomposition rules.

For a chiral media with the field- $\kappa$ -based constitutive relations, let us examine the complex Poynting vector. There are both self-terms  $\{\mathbf{E} \times (\nabla \times \mathbf{E}^*), (\nabla \times \mathbf{H}) \times \mathbf{H}^*\}$  and cross-terms  $\{\mathbf{E} \times (\nabla \times \mathbf{H}^*), (\nabla \times \mathbf{E}) \times \mathbf{H}^*\}$  for the complex Poynting vector when expanded as follows.

$$\begin{cases}
\mathbf{P} + i\mathbf{R} \equiv \mathbf{E} \times \mathbf{H}^* = \mathbf{E} \times \left[ \frac{i\varepsilon (\nabla \times \mathbf{E}) + \kappa (\nabla \times \mathbf{H})}{\kappa^2 - \varepsilon\mu} \right]^* = \frac{-i\varepsilon \mathbf{E} \times (\nabla \times \mathbf{E}^*) + \kappa \mathbf{E} \times (\nabla \times \mathbf{H}^*)}{\kappa^2 - \varepsilon\mu} \\
\mathbf{P} + i\mathbf{R} \equiv \mathbf{E} \times \mathbf{H}^* = \left[ \frac{\kappa (\nabla \times \mathbf{E}) - i\mu (\nabla \times \mathbf{H})}{\kappa^2 - \varepsilon\mu} \right] \times \mathbf{H}^* = \frac{\kappa (\nabla \times \mathbf{E}) \times \mathbf{H}^* - i\mu (\nabla \times \mathbf{H}) \times \mathbf{H}^*}{\kappa^2 - \varepsilon\mu}
\end{cases} \quad (\text{S4.8})$$

Both cross-terms carry the chirality parameter  $\beta \neq 0$  as should do. There are two ways that are suitable for the electric-magnetic democracy.

$$\begin{aligned}
\mathbf{A} \times (\nabla \times \mathbf{B}) &= \mathbf{A} \cdot (\nabla) \mathbf{B} - (\mathbf{A} \cdot \nabla) \mathbf{B} \Rightarrow \\
\mathbf{P} + i\mathbf{R} \equiv \mathbf{E} \times \mathbf{H}^* &= \frac{-i\varepsilon \mathbf{E} \times (\nabla \times \mathbf{E}^*) + \kappa \mathbf{E} \times (\nabla \times \mathbf{H}^*)}{\kappa^2 - \varepsilon\mu} \\
&= \frac{-i\varepsilon}{\kappa^2 - \varepsilon\mu} [\mathbf{E} \cdot (\nabla) \mathbf{E}^* - (\mathbf{E} \cdot \nabla) \mathbf{E}^*] + \frac{\kappa}{\kappa^2 - \varepsilon\mu} [\mathbf{E} \cdot (\nabla) \mathbf{H}^* - (\mathbf{E} \cdot \nabla) \mathbf{H}^*] \\
\mathbf{P} + i\mathbf{R} \equiv \mathbf{E} \times \mathbf{H}^* &= \frac{\kappa (\nabla \times \mathbf{E}) \times \mathbf{H}^* - i\mu (\nabla \times \mathbf{H}) \times \mathbf{H}^*}{\kappa^2 - \varepsilon\mu} = -\frac{\kappa \mathbf{H}^* \times (\nabla \times \mathbf{E}) - i\mu \mathbf{H}^* \times (\nabla \times \mathbf{H})}{\kappa^2 - \varepsilon\mu} \\
&= i \frac{\mu}{\kappa^2 - \varepsilon\mu} [\mathbf{H}^* \cdot (\nabla) \mathbf{H} - (\mathbf{H}^* \cdot \nabla) \mathbf{H}] - \frac{\kappa}{\kappa^2 - \varepsilon\mu} [\mathbf{H}^* \cdot (\nabla) \mathbf{E} - (\mathbf{H}^* \cdot \nabla) \mathbf{E}]
\end{aligned} \quad (\text{S4.9})$$

Resultantly, the decomposition of the Poynting vector gets complicated. Notwithstanding, we still discover the orbital-like and spin-like parts. The EM and reactive Poynting vectors are separated as follows in two ways (electric-based versus magnetic-based), when taking the real and imaginary parts of the above pair of formulas.

$$\begin{cases}
\mathbf{P} = \frac{\varepsilon}{\kappa^2 - \varepsilon\mu} \text{Im}[\mathbf{E} \cdot (\nabla) \mathbf{E}^* - (\mathbf{E} \cdot \nabla) \mathbf{E}^*] + \frac{\kappa}{\kappa^2 - \varepsilon\mu} \text{Re}[\mathbf{E} \cdot (\nabla) \mathbf{H}^* - (\mathbf{E} \cdot \nabla) \mathbf{H}^*] \\
= -\frac{\varepsilon}{\kappa^2 - \varepsilon\mu} \text{Im}[\mathbf{E}^* \cdot (\nabla) \mathbf{E} - (\mathbf{E}^* \cdot \nabla) \mathbf{E}] + \frac{\kappa}{\kappa^2 - \varepsilon\mu} \text{Re}[\mathbf{E}^* \cdot (\nabla) \mathbf{H} - (\mathbf{E}^* \cdot \nabla) \mathbf{H}] \\
\mathbf{R} = -\frac{\varepsilon}{\kappa^2 - \varepsilon\mu} \text{Re}[\mathbf{E} \cdot (\nabla) \mathbf{E}^* - (\mathbf{E} \cdot \nabla) \mathbf{E}^*] + \frac{\kappa}{\kappa^2 - \varepsilon\mu} \text{Im}[\mathbf{E} \cdot (\nabla) \mathbf{H}^* - (\mathbf{E} \cdot \nabla) \mathbf{H}^*] \\
= -\frac{\varepsilon}{\kappa^2 - \varepsilon\mu} \text{Re}[\mathbf{E}^* \cdot (\nabla) \mathbf{E} - (\mathbf{E}^* \cdot \nabla) \mathbf{E}] - \frac{\kappa}{\kappa^2 - \varepsilon\mu} \text{Im}[\mathbf{E}^* \cdot (\nabla) \mathbf{H} - (\mathbf{E}^* \cdot \nabla) \mathbf{H}]
\end{cases} \quad (\text{S4.10})$$

Meanwhile,

$$\begin{cases}
\mathbf{P} \equiv \text{Re}(\mathbf{E} \times \mathbf{H}^*) = -\frac{\mu}{\kappa^2 - \varepsilon\mu} \text{Im}[\mathbf{H}^* \cdot (\nabla) \mathbf{H} - (\mathbf{H}^* \cdot \nabla) \mathbf{H}] - \frac{\kappa}{\kappa^2 - \varepsilon\mu} \text{Re}[\mathbf{H}^* \cdot (\nabla) \mathbf{E} - (\mathbf{H}^* \cdot \nabla) \mathbf{E}] \\
\mathbf{R} \equiv \text{Im}(\mathbf{E} \times \mathbf{H}^*) = \frac{\mu}{\kappa^2 - \varepsilon\mu} \text{Re}[\mathbf{H}^* \cdot (\nabla) \mathbf{H} - (\mathbf{H}^* \cdot \nabla) \mathbf{H}] - \frac{\kappa}{\kappa^2 - \varepsilon\mu} \text{Im}[\mathbf{H}^* \cdot (\nabla) \mathbf{E} - (\mathbf{H}^* \cdot \nabla) \mathbf{E}]
\end{cases} \quad (\text{S4.11})$$

Therefore, we encounter additional terms due to optical chirality. Taking the averages of the two respective pairs, we get the followings.

$$\begin{cases}
\mathbf{P} = -\frac{1}{\kappa^2 - \varepsilon\mu} \text{Im} \left\{ \begin{aligned} &\varepsilon [\mathbf{E}^* \cdot (\nabla) \mathbf{E} - (\mathbf{E}^* \cdot \nabla) \mathbf{E}] \\ &+ \mu [\mathbf{H}^* \cdot (\nabla) \mathbf{H} - (\mathbf{H}^* \cdot \nabla) \mathbf{H}] \end{aligned} \right\} + \frac{\kappa}{\kappa^2 - \varepsilon\mu} \text{Re} \left\{ \begin{aligned} &\mathbf{E}^* \cdot (\nabla) \mathbf{H} - (\mathbf{E}^* \cdot \nabla) \mathbf{H} \\ &- \mathbf{H}^* \cdot (\nabla) \mathbf{E} + (\mathbf{H}^* \cdot \nabla) \mathbf{E} \end{aligned} \right\} \\
\mathbf{R} = \frac{1}{\kappa^2 - \varepsilon\mu} \text{Re} \left\{ \begin{aligned} &-\varepsilon [\mathbf{E}^* \cdot (\nabla) \mathbf{E} - (\mathbf{E}^* \cdot \nabla) \mathbf{E}] \\ &+ \mu [\mathbf{H}^* \cdot (\nabla) \mathbf{H} - (\mathbf{H}^* \cdot \nabla) \mathbf{H}] \end{aligned} \right\} - \frac{\kappa}{\kappa^2 - \varepsilon\mu} \text{Im} \left\{ \begin{aligned} &\mathbf{E}^* \cdot (\nabla) \mathbf{H} - (\mathbf{E}^* \cdot \nabla) \mathbf{H} \\ &+ \mathbf{H}^* \cdot (\nabla) \mathbf{E} - (\mathbf{H}^* \cdot \nabla) \mathbf{E} \end{aligned} \right\}
\end{cases} \quad (\text{S4.12})$$

In terms of the short-hand notations  $\{\mathbf{O}_\beta, \mathbf{S}_\beta, J, \mathbf{T}_\pm\}$ , we obtain the following concise set.

$$C_\kappa^{\text{field}} : \begin{cases} \mathbf{O}_\kappa \equiv \frac{1}{2} \text{Im} \left[ \frac{\varepsilon \mathbf{E}^* \cdot (\nabla) \mathbf{E} + \mu \mathbf{H}^* \cdot (\nabla) \mathbf{H}}{\varepsilon\mu - \kappa^2} \right] \\ \mathbf{S}_\kappa \equiv -\frac{1}{2} \text{Im} \left[ \frac{\varepsilon (\mathbf{E}^* \cdot \nabla) \mathbf{E} + \mu (\mathbf{H}^* \cdot \nabla) \mathbf{H}}{\varepsilon\mu - \kappa^2} \right] \\ \mathbf{P} = \mathbf{O}_\kappa + \mathbf{S}_\kappa + \frac{1}{2} \frac{\kappa}{\varepsilon\mu - \kappa^2} \text{Re}(\mathbf{T}_+) \\ \mathbf{R} = \frac{1}{2} \frac{\nabla J}{\varepsilon\mu - \kappa^2} - \frac{1}{2} \text{Re} \left[ \frac{\varepsilon (\mathbf{E}^* \cdot \nabla) \mathbf{E} - \mu (\mathbf{H}^* \cdot \nabla) \mathbf{H}}{\varepsilon\mu - \kappa^2} \right] + \frac{1}{2} \frac{\kappa}{\varepsilon\mu - \kappa^2} \text{Im}(\mathbf{T}_+) \end{cases} \quad (\text{S4.13})$$

Here,  $\mathbf{M}^* \cdot (\nabla) \mathbf{M} = M_j^* (\partial M_j / \partial x_i) \hat{\mathbf{e}}_i$  is an orbital-like parameter, while  $(\mathbf{M}^* \cdot \nabla) \mathbf{M} = M_j^* (\partial M_i / \partial x_j) \hat{\mathbf{e}}_i$  a spin-like parameter. Besides, summations are implied for repeated indices with  $\{x_i, \hat{\mathbf{e}}_i\}$  being a coordinate and its unit vector.

The above pair of decomposition rules express both EM and reactive Poynting vectors in their sub-parts in the presence of medium chirality. Although both of  $\{\mathbf{P}, \mathbf{R}\}$  are odd in  $\beta$ , we have sought circumstances under which they happen to be even in  $\beta$ .

Because  $J_{LR}^\alpha = 0$  for an obliquely colliding pair of plane waves, the conservation law involving the reactive Poynting vector is simplified respectively into  $\nabla \cdot \mathbf{R} + \frac{1}{2} \text{Im}(\mathbf{A}_+) = \frac{1}{2} \beta \text{Re}(\mathbf{B}_+)$  and  $\nabla \cdot \mathbf{R} + \frac{1}{2} \text{Im}(\mathbf{A}_+) = 0$ , while  $\mathbf{R}$  is simplified into the following.

$$\begin{cases} \mathbf{R} = \frac{1}{2} \text{Re} \left[ \varepsilon^{-1} (\mathbf{H}^* \cdot \nabla) \mathbf{H} - \mu^{-1} (\mathbf{E}^* \cdot \nabla) \mathbf{E} \right] + \frac{1}{2} \beta \text{Im}(\mathbf{T}_-) \\ \mathbf{R} = \frac{1}{2} \text{Re} \left[ \frac{\mu (\mathbf{H}^* \cdot \nabla) \mathbf{H} - \varepsilon (\mathbf{E}^* \cdot \nabla) \mathbf{E}}{\varepsilon \mu - \kappa^2} \right] + \frac{1}{2} \frac{\kappa}{\varepsilon \mu - \kappa^2} \text{Im}(\mathbf{T}_+) \end{cases} \quad (\text{S4.14})$$

The generic relation  $\text{Re}[\varepsilon \mathbf{E}^* \cdot (\nabla) \mathbf{E} - \mu \mathbf{H}^* \cdot (\nabla) \mathbf{H}] \equiv \nabla J$  has already been discussed. Therefore, both formulas are reduced for an achiral medium with  $\beta = \kappa = 0$  to  $\nabla J = 2\varepsilon \mu \mathbf{R}$ . In other words, the spatial gradient of the reactive energy density is proportional to the reactive Poynting vector.

All relations handled in this section take forms based on the electric-magnetic democracy.

### Section S5. Spin angular momentum (AM) density

Consider a spin angular momentum (AM) density  $\mathbf{M} \equiv \text{Im}(\frac{1}{2} \varepsilon \mathbf{E}^* \times \mathbf{E} + \frac{1}{2} \mu \mathbf{H}^* \times \mathbf{H})$ . Firstly, let us derive the chirality conservation law involving  $\nabla \cdot \mathbf{M}$  for a chiral media with the field- $\kappa$ -based constitutive relations.

$$\begin{aligned} \nabla \cdot (\mathbf{A} \times \mathbf{B}) &= (\nabla \times \mathbf{A}) \cdot \mathbf{B} - (\nabla \times \mathbf{B}) \cdot \mathbf{A} \Rightarrow \begin{cases} \nabla \times \mathbf{E} = \frac{\varepsilon \mu \beta}{1 - \varepsilon \mu \beta^2} \mathbf{E} + \frac{i\mu}{1 - \varepsilon \mu \beta^2} \mathbf{H} \\ \nabla \times \mathbf{H} = \frac{-i\varepsilon}{1 - \varepsilon \mu \beta^2} \mathbf{E} + \frac{\varepsilon \mu \beta}{1 - \varepsilon \mu \beta^2} \mathbf{H} \end{cases} \Rightarrow \\ \mathbf{M} &\equiv \text{Im}(\frac{1}{2} \varepsilon \mathbf{E}^* \times \mathbf{E} + \frac{1}{2} \mu \mathbf{H}^* \times \mathbf{H}) \Rightarrow \nabla \cdot \mathbf{M} \equiv \text{Im} \left[ \frac{1}{2} \varepsilon \nabla \cdot (\mathbf{E}^* \times \mathbf{E}) + \frac{1}{2} \mu \nabla \cdot (\mathbf{H}^* \times \mathbf{H}) \right] \\ 2\nabla \cdot \mathbf{M} &\equiv \text{Im} \left[ \varepsilon (\nabla \times \mathbf{E}^*) \cdot \mathbf{E} - \varepsilon (\nabla \times \mathbf{E}) \cdot \mathbf{E}^* + \mu (\nabla \times \mathbf{H}^*) \cdot \mathbf{H} - \mu (\nabla \times \mathbf{H}) \cdot \mathbf{H}^* \right] \\ &= \text{Im} \left[ \varepsilon \left( \frac{\varepsilon \mu \beta}{1 - \varepsilon \mu \beta^2} \mathbf{E}^* + \frac{-i\mu}{1 - \varepsilon \mu \beta^2} \mathbf{H}^* \right) \cdot \mathbf{E} - \varepsilon \left( \frac{\varepsilon \mu \beta}{1 - \varepsilon \mu \beta^2} \mathbf{E} + \frac{i\mu}{1 - \varepsilon \mu \beta^2} \mathbf{H} \right) \cdot \mathbf{E}^* \right. \\ &\quad \left. + \mu \left( \frac{i\varepsilon}{1 - \varepsilon \mu \beta^2} \mathbf{E}^* + \frac{\varepsilon \mu \beta}{1 - \varepsilon \mu \beta^2} \mathbf{H}^* \right) \cdot \mathbf{H} - \mu \left( \frac{-i\varepsilon}{1 - \varepsilon \mu \beta^2} \mathbf{E} + \frac{\varepsilon \mu \beta}{1 - \varepsilon \mu \beta^2} \mathbf{H} \right) \cdot \mathbf{H}^* \right] \\ &= \text{Im} \left[ \varepsilon \frac{-i\mu}{1 - \varepsilon \mu \beta^2} \mathbf{H}^* \cdot \mathbf{E} - \varepsilon \frac{i\mu}{1 - \varepsilon \mu \beta^2} \mathbf{H} \cdot \mathbf{E}^* + \mu \frac{i\varepsilon}{1 - \varepsilon \mu \beta^2} \mathbf{E}^* \cdot \mathbf{H} - \mu \frac{-i\varepsilon}{1 - \varepsilon \mu \beta^2} \mathbf{E} \cdot \mathbf{H}^* \right] \Rightarrow \\ &= \frac{1}{1 - \varepsilon \mu \beta^2} \text{Im} \left[ -i\varepsilon \mu \mathbf{H}^* \cdot \mathbf{E} - i\varepsilon \mu \mathbf{H} \cdot \mathbf{E}^* + i\varepsilon \mu \mathbf{E}^* \cdot \mathbf{H} + i\varepsilon \mu \mathbf{E} \cdot \mathbf{H}^* \right] \\ &= \frac{-\varepsilon \mu}{1 - \varepsilon \mu \beta^2} \text{Re}(\mathbf{H}^* \cdot \mathbf{E} + \mathbf{H} \cdot \mathbf{E}^* + \mathbf{E}^* \cdot \mathbf{H} + \mathbf{E} \cdot \mathbf{H}^*) = \frac{-4\varepsilon \mu}{1 - \varepsilon \mu \beta^2} \text{Re}(\mathbf{E} \cdot \mathbf{H}^*), \quad \begin{cases} \mathcal{C} \equiv \text{Im}(\mathbf{E} \cdot \mathbf{H}^*) \\ \mathcal{K} \equiv \text{Re}(\mathbf{E} \cdot \mathbf{H}^*) \end{cases} \\ \nabla \cdot \mathbf{M} + \frac{2\varepsilon \mu}{1 - \varepsilon \mu \beta^2} \text{Re}(\mathbf{E} \cdot \mathbf{H}^*) &= 0 \Rightarrow \nabla \cdot \mathbf{M} + \frac{2\varepsilon \mu}{1 - \varepsilon \mu \beta^2} \mathcal{K} = 0 \end{aligned} \quad (\text{S5.1})$$

As a byproduct,  $\nabla \cdot \mathbf{M}$  is symmetric in  $\beta$ .

Secondly, let us then derive the chirality conservation law involving  $\nabla \cdot \mathbf{M}$  for a chiral media with the field- $\kappa$ -based constitutive relations.

$$\begin{aligned}
\nabla \cdot (\mathbf{A} \times \mathbf{B}) &= (\nabla \times \mathbf{A}) \cdot \mathbf{B} - (\nabla \times \mathbf{B}) \cdot \mathbf{A} \Rightarrow \begin{cases} \nabla \times \mathbf{E} = i\mu \mathbf{H} + \kappa \mathbf{E} \\ \nabla \times \mathbf{H} = -i\varepsilon \mathbf{E} + \kappa \mathbf{H} \end{cases} \Rightarrow \\
\mathbf{M} &\equiv \text{Im} \left( \frac{1}{2} \varepsilon \mathbf{E}^* \times \mathbf{E} + \frac{1}{2} \mu \mathbf{H}^* \times \mathbf{H} \right) \Rightarrow \nabla \cdot \mathbf{M} \equiv \text{Im} \left[ \frac{1}{2} \varepsilon \nabla \cdot (\mathbf{E}^* \times \mathbf{E}) + \frac{1}{2} \mu \nabla \cdot (\mathbf{H}^* \times \mathbf{H}) \right] \\
2\nabla \cdot \mathbf{M} &\equiv \text{Im} \left[ \varepsilon (\nabla \times \mathbf{E}^*) \cdot \mathbf{E} - \varepsilon (\nabla \times \mathbf{E}) \cdot \mathbf{E}^* + \mu (\nabla \times \mathbf{H}^*) \cdot \mathbf{H} - \mu (\nabla \times \mathbf{H}) \cdot \mathbf{H}^* \right] \\
&= \text{Im} \left[ \varepsilon (-i\mu \mathbf{H}^* + \kappa \mathbf{E}^*) \cdot \mathbf{E} - \varepsilon (i\mu \mathbf{H} + \kappa \mathbf{E}) \cdot \mathbf{E}^* \right. \\
&\quad \left. + \mu (i\varepsilon \mathbf{E}^* + \kappa \mathbf{H}^*) \cdot \mathbf{H} - \mu (-i\varepsilon \mathbf{E} + \kappa \mathbf{H}) \cdot \mathbf{H}^* \right] \\
&= \text{Im} \left( \begin{aligned} &\kappa \varepsilon |\mathbf{E}|^2 - i\varepsilon \mu \mathbf{H}^* \cdot \mathbf{E} - \kappa \varepsilon |\mathbf{E}|^2 - i\varepsilon \mu \mathbf{H} \cdot \mathbf{E}^* \\ &+ \kappa \mu |\mathbf{H}|^2 + i\varepsilon \mu \mathbf{E}^* \cdot \mathbf{H} - \kappa \mu |\mathbf{H}|^2 + i\varepsilon \mu \mathbf{E} \cdot \mathbf{H}^* \end{aligned} \right) \Rightarrow \\
&= \text{Im} \left[ -i\varepsilon \mu \mathbf{H}^* \cdot \mathbf{E} - i\varepsilon \mu \mathbf{H} \cdot \mathbf{E}^* + i\varepsilon \mu \mathbf{E}^* \cdot \mathbf{H} + i\varepsilon \mu \mathbf{E} \cdot \mathbf{H}^* \right] \\
&= \varepsilon \mu \text{Re} \left( -\mathbf{H}^* \cdot \mathbf{E} - \mathbf{H} \cdot \mathbf{E}^* + \mathbf{E}^* \cdot \mathbf{H} + \mathbf{E} \cdot \mathbf{H}^* \right) = 0 \Rightarrow \nabla \cdot \mathbf{M} = 0
\end{aligned} \tag{S5.2}$$

When the Gauss laws  $\nabla \cdot \mathbf{A} = \nabla \cdot \mathbf{B} = 0$  are taken into consideration, the vector identity  $\nabla \times (\mathbf{A} \times \mathbf{B}) = (\nabla \cdot \mathbf{B}) \mathbf{A} - (\nabla \cdot \mathbf{A}) \mathbf{B} - (\mathbf{A} \cdot \nabla) \mathbf{B} + (\mathbf{B} \cdot \nabla) \mathbf{A}$  is reduced to  $\nabla \times (\mathbf{A} \times \mathbf{B}) = (\mathbf{B} \cdot \nabla) \mathbf{A} - (\mathbf{A} \cdot \nabla) \mathbf{B}$ . Resultantly,

$$\begin{aligned}
\mathbf{M} &\equiv \text{Im} \left( \frac{1}{2} \varepsilon \mathbf{E}^* \times \mathbf{E} + \frac{1}{2} \mu \mathbf{H}^* \times \mathbf{H} \right) \Rightarrow \\
\nabla \times (\mathbf{A} \times \mathbf{B}) &= (\nabla \cdot \mathbf{B}) \mathbf{A} - (\nabla \cdot \mathbf{A}) \mathbf{B} - (\mathbf{A} \cdot \nabla) \mathbf{B} + (\mathbf{B} \cdot \nabla) \mathbf{A} \\
\begin{cases} \nabla \cdot \mathbf{A} = 0 \\ \nabla \cdot \mathbf{B} = 0 \end{cases} &\Rightarrow \nabla \times (\mathbf{A} \times \mathbf{B}) = (\mathbf{B} \cdot \nabla) \mathbf{A} - (\mathbf{A} \cdot \nabla) \mathbf{B} \Rightarrow \\
\frac{1}{2} \nabla \times \mathbf{M} &= \frac{1}{4} \nabla \times \text{Im} \left( \varepsilon \mathbf{E}^* \times \mathbf{E} + \mu \mathbf{H}^* \times \mathbf{H} \right) \\
&= \frac{1}{4} \left\{ \varepsilon \text{Im} \left[ (\mathbf{E} \cdot \nabla) \mathbf{E}^* - (\mathbf{E}^* \cdot \nabla) \mathbf{E} \right] + \mu \text{Im} \left[ (\mathbf{H} \cdot \nabla) \mathbf{H}^* - (\mathbf{H}^* \cdot \nabla) \mathbf{H} \right] \right\} \\
&= -\frac{1}{2} \varepsilon \text{Im} \left[ (\mathbf{E}^* \cdot \nabla) \mathbf{E} \right] - \frac{1}{2} \mu \text{Im} \left[ (\mathbf{H}^* \cdot \nabla) \mathbf{H} \right] = -\frac{1}{2} \text{Im} \left[ \varepsilon (\mathbf{E}^* \cdot \nabla) \mathbf{E} + (\mathbf{H}^* \cdot \nabla) \mathbf{H} \right]
\end{aligned} \tag{S5.3}$$

Consequently, both spin-like parts get related to the half-curl of the spin AM density, but with distinct divisors.

$$\begin{cases} C_{\beta}^{curl} : \mathbf{S}_{\beta} \equiv -\frac{1}{2} \text{Im} \left[ \mu^{-1} (\mathbf{E}^* \cdot \nabla) \mathbf{E} + \varepsilon^{-1} (\mathbf{H}^* \cdot \nabla) \mathbf{H} \right] = \frac{1}{2} (\varepsilon \mu)^{-1} \nabla \times \mathbf{M} \\ C_{\kappa}^{field} : \mathbf{S}_{\kappa} \equiv -\frac{1}{2} \text{Im} \left[ \frac{\varepsilon (\mathbf{E}^* \cdot \nabla) \mathbf{E} + \mu (\mathbf{H}^* \cdot \nabla) \mathbf{H}}{\varepsilon \mu - \kappa^2} \right] = \frac{1}{2} (\varepsilon \mu - \kappa^2)^{-1} \nabla \times \mathbf{M} \end{cases} \tag{S5.4}$$

The spin AM density  $\mathbf{M}$  serves as a helicity flux for the EM helicity.

With the assumption of  $\varepsilon, \mu \in \mathbb{R}$ , let us prepare both  $\text{Im}(\mathbf{E}^* \times \mathbf{E})$  and  $\text{Im}(\mathbf{H}^* \times \mathbf{H})$  for  $\mathbf{M} \equiv \text{Im} \left( \frac{1}{2} \varepsilon \mathbf{E}^* \times \mathbf{E} + \frac{1}{2} \mu \mathbf{H}^* \times \mathbf{H} \right)$ . Let us start with the following cross product between the electric fields.

$$\begin{aligned}
& \begin{cases} \mathbf{E}_{LR}^\alpha = \mathbf{Q}_L - iZ\mathbf{Q}_R^\alpha \\ \mathbf{H}_{LR}^\alpha = -iZ^{-1}\mathbf{Q}_L + \mathbf{Q}_R^\alpha \end{cases} \Rightarrow \\
& (\mathbf{E}_{LR}^\alpha)^* \times \mathbf{E}_{LR}^\alpha = (\mathbf{Q}_L - iZ\mathbf{Q}_R^\alpha)^* \times (\mathbf{Q}_L - iZ\mathbf{Q}_R^\alpha) = \left[ (\mathbf{Q}_L)^* + iZ(\mathbf{Q}_R^\alpha)^* \right] \times (\mathbf{Q}_L - iZ\mathbf{Q}_R^\alpha) \\
& = (\mathbf{Q}_L)^* \times \mathbf{Q}_L + Z^2 (\mathbf{Q}_R^\alpha)^* \times \mathbf{Q}_R^\alpha - iZ (\mathbf{Q}_L)^* \times \mathbf{Q}_R^\alpha + iZ (\mathbf{Q}_R^\alpha)^* \times \mathbf{Q}_L \\
& = (\mathbf{Q}_L)^* \times \mathbf{Q}_L + Z^2 (\mathbf{Q}_R^\alpha)^* \times \mathbf{Q}_R^\alpha - 2iZ \operatorname{Re} \left[ (\mathbf{Q}_L)^* \times \mathbf{Q}_R^\alpha \right] \Rightarrow \\
& \operatorname{Im} \left[ (\mathbf{E}_{LR}^\alpha)^* \times \mathbf{E}_{LR}^\alpha \right] = \operatorname{Im} \left[ (\mathbf{Q}_L)^* \times \mathbf{Q}_L \right] + Z^2 \operatorname{Im} \left[ (\mathbf{Q}_R^\alpha)^* \times \mathbf{Q}_R^\alpha \right] - 2Z \operatorname{Re} \left[ (\mathbf{Q}_L)^* \times \mathbf{Q}_R^\alpha \right]
\end{aligned} \tag{S5.5}$$

Likewise, we form the following cross product between the magnetic fields.

$$\begin{aligned}
& (\mathbf{H}_{LR}^\alpha)^* \times \mathbf{H}_{LR}^\alpha = (-iZ^{-1}\mathbf{Q}_L + \mathbf{Q}_R^\alpha)^* \times (-iZ^{-1}\mathbf{Q}_L + \mathbf{Q}_R^\alpha) \\
& = \left[ iZ^{-1}(\mathbf{Q}_L)^* + (\mathbf{Q}_R^\alpha)^* \right] \times (-iZ^{-1}\mathbf{Q}_L + \mathbf{Q}_R^\alpha) \\
& = Z^{-2}(\mathbf{Q}_L)^* \times \mathbf{Q}_L + (\mathbf{Q}_R^\alpha)^* \times \mathbf{Q}_R^\alpha + iZ^{-1}(\mathbf{Q}_L)^* \times \mathbf{Q}_R^\alpha - iZ^{-1}(\mathbf{Q}_R^\alpha)^* \times \mathbf{Q}_L \\
& = Z^{-2}(\mathbf{Q}_L)^* \times \mathbf{Q}_L + (\mathbf{Q}_R^\alpha)^* \times \mathbf{Q}_R^\alpha + 2iZ^{-1} \operatorname{Re} \left[ (\mathbf{Q}_L)^* \times \mathbf{Q}_R^\alpha \right] \Rightarrow \\
& \operatorname{Im} \left[ (\mathbf{H}_{LR}^\alpha)^* \times \mathbf{H}_{LR}^\alpha \right] = Z^{-2} \operatorname{Im} \left[ (\mathbf{Q}_L)^* \times \mathbf{Q}_L \right] + \operatorname{Im} \left[ (\mathbf{Q}_R^\alpha)^* \times \mathbf{Q}_R^\alpha \right] + 2Z \operatorname{Re} \left[ (\mathbf{Q}_L)^* \times \mathbf{Q}_R^\alpha \right]
\end{aligned} \tag{S5.6}$$

Resultantly, the average spin AM is found below in a sort of both symmetric and anti-symmetric forms.

$$\begin{aligned}
\mathbf{M}_{LR}^\alpha & \equiv \operatorname{Im} \left[ \frac{1}{2} \varepsilon (\mathbf{E}_{LR}^\alpha)^* \times \mathbf{E}_{LR}^\alpha + \frac{1}{2} \mu (\mathbf{H}_{LR}^\alpha)^* \times \mathbf{H}_{LR}^\alpha \right] \\
& = \frac{1}{2} (\varepsilon + Z^{-2} \mu) \operatorname{Im} \left[ (\mathbf{Q}_L)^* \times \mathbf{Q}_L \right] + \frac{1}{2} (\varepsilon Z^2 + \mu) \operatorname{Im} \left[ (\mathbf{Q}_R^\alpha)^* \times \mathbf{Q}_R^\alpha \right] \\
& + Z (\mu - \varepsilon) \operatorname{Re} \left[ (\mathbf{Q}_L)^* \times \mathbf{Q}_R^\alpha \right] \\
& = \varepsilon \operatorname{Im} \left[ (\mathbf{Q}_L)^* \times \mathbf{Q}_L \right] + \mu \operatorname{Im} \left[ (\mathbf{Q}_R^\alpha)^* \times \mathbf{Q}_R^\alpha \right] + Z (\mu - \varepsilon) \operatorname{Re} \left[ (\mathbf{Q}_L)^* \times \mathbf{Q}_R^\alpha \right]
\end{aligned} \tag{S5.7}$$

Consider the vector identity together with a pair of the pertinent Gauss laws.

$$\begin{aligned}
& \nabla \times (\mathbf{A} \times \mathbf{B}) = (\nabla \cdot \mathbf{B}) \mathbf{A} - (\nabla \cdot \mathbf{A}) \mathbf{B} - (\mathbf{A} \cdot \nabla) \mathbf{B} + (\mathbf{B} \cdot \nabla) \mathbf{A} \Rightarrow \begin{cases} \nabla \cdot \mathbf{E} = 0 \\ \nabla \cdot \mathbf{H} = 0 \end{cases} \Rightarrow \\
& \begin{cases} \nabla \times (\mathbf{E}^* \times \mathbf{E}) = (\nabla \cdot \mathbf{E}) \mathbf{E}^* - (\nabla \cdot \mathbf{E}^*) \mathbf{E} - (\mathbf{E}^* \cdot \nabla) \mathbf{E} + (\mathbf{E} \cdot \nabla) \mathbf{E}^* = -(\mathbf{E}^* \cdot \nabla) \mathbf{E} + (\mathbf{E} \cdot \nabla) \mathbf{E}^* \\ \nabla \times (\mathbf{H}^* \times \mathbf{H}) = (\nabla \cdot \mathbf{H}) \mathbf{H}^* - (\nabla \cdot \mathbf{H}^*) \mathbf{H} - (\mathbf{H}^* \cdot \nabla) \mathbf{H} + (\mathbf{H} \cdot \nabla) \mathbf{H}^* = -(\mathbf{H}^* \cdot \nabla) \mathbf{H} + (\mathbf{H} \cdot \nabla) \mathbf{H}^* \end{cases}
\end{aligned} \tag{S5.8}$$

Of course, we are left only with the spin-like parts under the condition  $\varepsilon, \mu \in \mathbb{R}$ .

$$\begin{aligned}
\mathbf{M} &\equiv \text{Im}\left(\frac{1}{2}\varepsilon\mathbf{E}^* \times \mathbf{E} + \frac{1}{2}\mu\mathbf{H}^* \times \mathbf{H}\right) \Rightarrow \nabla \times \mathbf{M} \equiv \text{Im}\left[\frac{1}{2}\varepsilon\nabla \times (\mathbf{E}^* \times \mathbf{E}) + \frac{1}{2}\mu\nabla \times (\mathbf{H}^* \times \mathbf{H})\right] \\
\varepsilon, \mu &\in \mathbb{R} \Rightarrow \\
2\nabla \times \mathbf{M} &\equiv \text{Im}\left[\varepsilon(\mathbf{E} \cdot \nabla)\mathbf{E}^* - \varepsilon(\mathbf{E}^* \cdot \nabla)\mathbf{E} + \mu(\mathbf{H} \cdot \nabla)\mathbf{H}^* - \mu(\mathbf{H}^* \cdot \nabla)\mathbf{H}\right] \\
&= -2\text{Im}\left[\varepsilon(\mathbf{E}^* \cdot \nabla)\mathbf{E} + \mu(\mathbf{H}^* \cdot \nabla)\mathbf{H}\right] \Rightarrow \\
\begin{cases} \mathbf{S}_\beta \equiv -\frac{1}{2}\text{Im}\left[\mu^{-1}(\mathbf{E}^* \cdot \nabla)\mathbf{E} + \varepsilon^{-1}(\mathbf{H}^* \cdot \nabla)\mathbf{H}\right] \\ \mathbf{S}_\kappa \equiv -\frac{1}{2}\text{Im}\left[\frac{\varepsilon(\mathbf{E}^* \cdot \nabla)\mathbf{E} + \mu(\mathbf{H}^* \cdot \nabla)\mathbf{H}}{\varepsilon\mu - \kappa^2}\right] \end{cases} &\Rightarrow \quad (S5.9) \\
\frac{1}{2}\nabla \times \mathbf{M} &= -\frac{1}{2}\text{Im}\left[\varepsilon(\mathbf{E}^* \cdot \nabla)\mathbf{E} + \mu(\mathbf{H}^* \cdot \nabla)\mathbf{H}\right] = \begin{cases} (\varepsilon\mu)\mathbf{S}_\kappa \\ (\varepsilon\mu - \kappa^2)\mathbf{S}_\kappa \end{cases}
\end{aligned}$$

There is only a slight difference between the pair of constitutive relations.

## Section S6. Evaluations of dot- and cross-products for oblique collisions

Let us evaluate various self- and cross-products between  $\{\mathbf{Q}_L, \mathbf{Q}_R^\alpha\}$ . There are several easier parameters, that consist of the waves of same types.

$$\begin{cases} (\mathbf{Q}_L)^* \cdot \mathbf{Q}_L \equiv |\mathcal{Q}_L|^2, & (\mathbf{Q}_L)^* \times \mathbf{Q}_L = i|\mathcal{Q}_L|^2 \hat{\xi}_- \\ (\mathbf{Q}_R^\alpha)^* \cdot \mathbf{Q}_R^\alpha \equiv |\mathcal{Q}_R^\alpha|^2, & (\mathbf{Q}_R^\alpha)^* \times \mathbf{Q}_R^\alpha = -i|\mathcal{Q}_R^\alpha|^2 \hat{\eta}_- \end{cases} \quad (S6.1)$$

In comparison, the following set of parameters handles both of  $\{\mathbf{Q}_L, \mathbf{Q}_R^\alpha\}$  so that care should be exercised as follows.

$$\begin{aligned}
(\mathbf{Q}_L)^* \cdot \mathbf{Q}_R^\alpha &= (\mathcal{Q}_L)^* \mathcal{Q}_R^\alpha \left[ \frac{1}{\sqrt{2}} (\hat{\mathbf{z}} - i\hat{\xi}_+) \exp(ik_L \xi_-) \right]^* \cdot \left[ \frac{1}{\sqrt{2}} (\hat{\mathbf{z}} + i\hat{\eta}_+) \exp(ik_R \eta_-) \right] \\
&= (\mathcal{Q}_L)^* \mathcal{Q}_R^\alpha \frac{1}{2} \exp[-i(k_L \xi_- - k_R \eta_-)] (\hat{\mathbf{z}} + i\hat{\xi}_+) \cdot (\hat{\mathbf{z}} + i\hat{\eta}_+) \\
&= (\mathcal{Q}_L)^* \mathcal{Q}_R^\alpha \frac{1}{2} (1 - \hat{\eta}_+ \cdot \hat{\xi}_+) \exp[-i(k_L \xi_- - k_R \eta_-)] \quad (S6.2) \\
(\mathbf{Q}_L)^* \cdot \mathbf{Q}_R^\alpha &= \left| (\mathcal{Q}_L)^* \mathcal{Q}_R^\alpha \right| \frac{1}{2} (1 - \cos \alpha) \exp[-i(\Gamma_{LR}^\alpha + \delta_{LR}^\alpha)] \Rightarrow \\
\begin{cases} \text{Re}\left[(\mathbf{Q}_L)^* \cdot \mathbf{Q}_R^\alpha\right] &= \left| (\mathcal{Q}_L)^* \mathcal{Q}_R^\alpha \right| \frac{1}{2} (1 - \cos \alpha) \cos(\Gamma_{LR}^\alpha + \delta_{LR}^\alpha) \\ \text{Im}\left[(\mathbf{Q}_L)^* \cdot \mathbf{Q}_R^\alpha\right] &= -\left| (\mathcal{Q}_L)^* \mathcal{Q}_R^\alpha \right| \frac{1}{2} (1 - \cos \alpha) \sin(\Gamma_{LR}^\alpha + \delta_{LR}^\alpha) \end{cases}
\end{aligned}$$

Here, we made use of the definitions for  $\{\Gamma_{LR}^\alpha, \delta_{LR}^\alpha\}$ . Likewise, consider the cross product.



$$\begin{aligned}
(\mathbf{Q}_L)^* \times \mathbf{Q}_R^\alpha &= (\mathcal{Q}_L)^* \mathcal{Q}_R^\alpha \left[ \frac{1}{\sqrt{2}} (\hat{\mathbf{z}} + i\hat{\mathbf{n}}_+) \exp(ik_R \eta_-) \right] \times \left[ \frac{1}{\sqrt{2}} (\hat{\mathbf{z}} - i\hat{\xi}_+) \exp(ik_L \xi_-) \right]^* \\
&= (\mathcal{Q}_L)^* \mathcal{Q}_R^\alpha \left[ \frac{1}{\sqrt{2}} (\hat{\mathbf{z}} - i\hat{\xi}_+) \exp(ik_L \xi_-) \right]^* \times \left[ \frac{1}{\sqrt{2}} (\hat{\mathbf{z}} + i\hat{\mathbf{n}}_+) \exp(ik_R \eta_-) \right] \\
&= (\mathcal{Q}_L)^* \mathcal{Q}_R^\alpha \frac{1}{2} \exp[-i(k_L \xi_- - k_R \eta_-)] (\hat{\mathbf{z}} + i\hat{\xi}_+) \times (\hat{\mathbf{z}} + i\hat{\mathbf{n}}_+) \\
&= (\mathcal{Q}_L)^* \mathcal{Q}_R^\alpha \frac{1}{2} \exp[-i(k_L \xi_- - k_R \eta_-)] \left[ i\hat{\mathbf{z}} \times (\hat{\mathbf{n}}_+ - \hat{\xi}_+) - \hat{\xi}_+ \times \hat{\mathbf{n}}_+ \right] \\
&= (\mathcal{Q}_L)^* \mathcal{Q}_R^\alpha \frac{1}{2} \exp[-i(k_L \xi_- - k_R \eta_-)] \left[ i(\hat{\xi}_+ - \hat{\mathbf{n}}_+) \times \hat{\mathbf{z}} - \hat{\xi}_+ \times \hat{\mathbf{n}}_+ \right] \\
&= (\mathcal{Q}_L)^* \mathcal{Q}_R^\alpha \frac{1}{2} \exp[-i(k_L \xi_- - k_R \eta_-)] \left[ i(\hat{\xi}_- - \hat{\mathbf{n}}_-) + \sin \alpha \hat{\mathbf{z}} \right] \Rightarrow \\
(\mathbf{Q}_L)^* \times \mathbf{Q}_R^\alpha &= \left| (\mathcal{Q}_L)^* \mathcal{Q}_R^\alpha \right| \exp[-i(\Gamma_{LR}^\alpha + \delta_{LR}^\alpha)] \frac{1}{2} \left[ i(\hat{\xi}_- - \hat{\mathbf{n}}_-) + \sin \alpha \hat{\mathbf{z}} \right] \\
\mathbf{Q}_R^\alpha \times (\mathbf{Q}_L)^* &= (\mathcal{Q}_L)^* \mathcal{Q}_R^\alpha \\
\text{Im} \left[ \mathbf{Q}_R^\alpha \times (\mathbf{Q}_L)^* \right] &= -\frac{1}{2} \left| (\mathcal{Q}_L)^* \mathcal{Q}_R^\alpha \right| \cos(\Gamma_{LR}^\alpha + \delta_{LR}^\alpha) (\hat{\xi}_- - \hat{\mathbf{n}}_-)
\end{aligned} \tag{S6.3}$$

Taking real and imaginary parts,

$$\begin{cases} \text{Re} \left[ (\mathbf{Q}_L)^* \times \mathbf{Q}_R^\alpha \right] = \left| (\mathcal{Q}_L)^* \mathcal{Q}_R^\alpha \right| \frac{1}{2} \left[ \sin \alpha \cos(\Gamma_{LR}^\alpha + \delta_{LR}^\alpha) \hat{\mathbf{z}} + \sin(\Gamma_{LR}^\alpha + \delta_{LR}^\alpha) (\hat{\xi}_- - \hat{\mathbf{n}}_-) \right] \\ \text{Im} \left[ (\mathbf{Q}_L)^* \times \mathbf{Q}_R^\alpha \right] = \left| (\mathcal{Q}_L)^* \mathcal{Q}_R^\alpha \right| \frac{1}{2} \left[ \cos(\Gamma_{LR}^\alpha + \delta_{LR}^\alpha) (\hat{\xi}_- - \hat{\mathbf{n}}_-) - \sin \alpha \sin(\Gamma_{LR}^\alpha + \delta_{LR}^\alpha) \hat{\mathbf{z}} \right] \end{cases} \tag{S6.4}$$

It turns out that both parts  $\left\{ \text{Re} \left[ (\mathbf{Q}_L)^* \times \mathbf{Q}_R^\alpha \right], \text{Im} \left[ (\mathbf{Q}_L)^* \times \mathbf{Q}_R^\alpha \right] \right\}$  contain not only the longitudinal vector  $\hat{\xi}_- - \hat{\mathbf{n}}_-$  but also the transverse vector  $\hat{\mathbf{z}}$ .

In addition, it is stressed that all formulas presented in this section hold true for both types of constitutive relations.
